# Supplementary material
Source: publisher figshare collection journal article supplement (https://acs.figshare.com/ndownloader/files/5809128)
Supplement: Supplementary file 1 [file 5809128]

**Table 6. Anisotropic Displacement Parameters (continued)**

| Atom | $U_{11}$ | $U_{22}$  | $U_{33}$ | $U_{23}$  | $U_{13}$  | $U_{12}$  |
|------|----------|-----------|----------|-----------|-----------|-----------|
| C27  | 0.050(4) | 0.046(4)  | 0.059(5) | 0.005(4)  | 0.001(4)  | 0.001(3)  |
| C28  | 0.052(5) | 0.072(6)  | 0.071(5) | 0.003(5)  | 0.002(4)  | 0.005(4)  |
| C29  | 0.074(6) | 0.058(5)  | 0.098(7) | 0.011(5)  | -0.010(5) | 0.003(4)  |
| C30  | 0.088(7) | 0.088(8)  | 0.077(7) | 0.022(6)  | -0.002(5) | -0.030(6) |
| C31  | 0.100(7) | 0.103(8)  | 0.065(6) | -0.003(6) | 0.027(5)  | -0.026(6) |
| C32  | 0.074(6) | 0.071(6)  | 0.068(5) | -0.008(5) | 0.009(5)  | -0.020(4) |
| C33  | 0.105(7) | 0.084(7)  | 0.116(7) | 0.020(6)  | 0.061(6)  | -0.002(6) |
| C34  | 0.063(5) | 0.089(7)  | 0.056(5) | 0.003(4)  | 0.021(4)  | -0.005(5) |
| C35  | 0.087(6) | 0.086(6)  | 0.088(6) | -0.003(5) | 0.053(5)  | -0.012(6) |
| C36  | 0.122(8) | 0.082(7)  | 0.121(8) | -0.003(6) | 0.084(7)  | 0.007(6)  |
| C37  | 0.101(8) | 0.139(11) | 0.105(8) | -0.008(7) | 0.057(7)  | 0.024(7)  |
| C38  | 0.077(7) | 0.145(11) | 0.133(9) | -0.019(8) | 0.059(6)  | -0.012(7) |
| C39  | 0.084(7) | 0.114(8)  | 0.088(6) | -0.001(6) | 0.046(5)  | -0.014(6) |

The form of the anisotropic displacement parameter is:

$$\exp[-2\pi^2(h^2a^2U_{11} + k^2b^2U_{22} + l^2c^2U_{33} + 2klb^*c^*U_{23} + 2hla^*c^*U_{13} + 2hka^*b^*U_{12})]$$

**Table 7. Derived Atomic Coordinates and Displacement Parameters for Hydrogen Atoms**

| Atom | <i>x</i> | <i>y</i> | <i>z</i> | <i>U</i> <sub>eq</sub> , Å <sup>2</sup> |
|------|----------|----------|----------|-----------------------------------------|
| H5O  | 0.0782   | 0.1654   | 0.0806   | 0.122                                   |
| H2   | -0.0141  | -0.0319  | 0.1962   | 0.074                                   |
| H3   | 0.0278   | -0.2389  | 0.1134   | 0.064                                   |
| H4   | -0.1130  | -0.0579  | 0.0034   | 0.064                                   |
| H5   | 0.0366   | -0.0384  | -0.0812  | 0.072                                   |
| H6   | 0.2003   | 0.0373   | 0.0589   | 0.075                                   |
| H8   | 0.4192   | -0.1459  | 0.2755   | 0.111                                   |
| H9A  | 0.4311   | -0.0992  | 0.5309   | 0.126                                   |
| H9B  | 0.5582   | -0.0361  | 0.5747   | 0.126                                   |
| H9C  | 0.5514   | -0.1455  | 0.5112   | 0.126                                   |
| H10A | 0.3018   | 0.0953   | 0.4187   | 0.532                                   |
| H10B | 0.3597   | 0.1620   | 0.3459   | 0.532                                   |
| H10C | 0.4240   | 0.1644   | 0.4665   | 0.532                                   |
| H11A | 0.6035   | 0.0759   | 0.3179   | 0.611                                   |
| H11B | 0.6615   | -0.0335  | 0.3749   | 0.611                                   |
| H11C | 0.6684   | 0.0759   | 0.4384   | 0.611                                   |
| H12A | -0.0621  | -0.0865  | 0.3275   | 0.268                                   |
| H12B | 0.0668   | -0.0292  | 0.3810   | 0.268                                   |
| H14  | 0.2139   | -0.1220  | 0.5199   | 0.161                                   |
| H15  | 0.2482   | -0.2269  | 0.6645   | 0.177                                   |
| H16  | 0.0948   | -0.3302  | 0.6885   | 0.196                                   |
| H17  | -0.0882  | -0.3404  | 0.5601   | 0.190                                   |
| H18  | -0.1210  | -0.2343  | 0.4147   | 0.152                                   |
| H19A | -0.0586  | -0.3240  | 0.2238   | 0.083                                   |
| H19B | -0.1279  | -0.3663  | 0.1110   | 0.083                                   |
| H21  | -0.1641  | -0.4589  | 0.2925   | 0.106                                   |
| H22  | -0.3327  | -0.4951  | 0.3485   | 0.157                                   |
| H23  | -0.5145  | -0.4110  | 0.2771   | 0.155                                   |
| H24  | -0.5339  | -0.2820  | 0.1512   | 0.150                                   |
| H25  | -0.3645  | -0.2380  | 0.0988   | 0.128                                   |
| H26A | -0.2808  | -0.1278  | -0.1060  | 0.077                                   |
| H26B | -0.2722  | -0.2214  | -0.1834  | 0.077                                   |
| H28  | -0.2682  | 0.0538   | -0.1561  | 0.083                                   |

**Table 7. Derived Parameters for Hydrogen Atoms (continued)**

| Atom | x       | y       | z       | $U_{eq}, \text{\AA}^2$ |
|------|---------|---------|---------|------------------------|
| H29  | -0.2315 | 0.1857  | -0.2666 | 0.103                  |
| H30  | -0.1480 | 0.1292  | -0.3914 | 0.109                  |
| H31  | -0.0954 | -0.0502 | -0.4041 | 0.106                  |
| H32  | -0.1321 | -0.1784 | -0.2936 | 0.089                  |
| H33A | 0.2721  | -0.0823 | -0.0455 | 0.115                  |
| H33B | 0.1648  | -0.1216 | -0.1442 | 0.115                  |
| H35  | 0.1730  | -0.3586 | -0.0673 | 0.097                  |
| H36  | 0.2898  | -0.5080 | -0.0775 | 0.118                  |
| H37  | 0.4762  | -0.4834 | -0.1148 | 0.131                  |
| H38  | 0.5471  | -0.3099 | -0.1220 | 0.135                  |
| H39  | 0.4327  | -0.1582 | -0.1015 | 0.110                  |

**2-Propenyl 6-O-(Triphenylmethyl)- $\beta$ -D-glucopyranoside (35).**

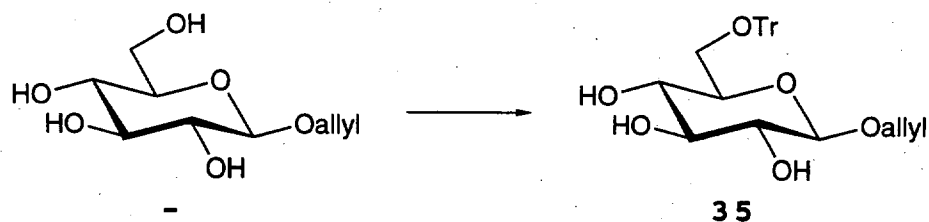

Dry pyridine (20 mL) was added to a dry 50 mL round-bottomed flask charged with 2-propenyl- $\beta$ -D-glucopyranoside<sup>56</sup> (2.60 g, 11.8 mmol),  $\text{Ph}_3\text{CCl}$  (5.70 g, 20.4 mmol), and DMAP (180 mg, 1.47 mmol). The resulting mixture was heated at 80 °C for 8 h, cooled to room temperature, and evaporated. The residue was dissolved in  $\text{CH}_2\text{Cl}_2$  (30 mL) and washed with cold (4 °C) hydrochloric acid (0.5 M, 2 x 20 mL), saturated aqueous  $\text{NaHCO}_3$  (20 mL) and brine (20 mL), dried, and evaporated. Flash chromatography of the residue over silica gel (4 x 20 cm), using 3:7 EtOAc-hexane and then EtOAc, gave **35** (3.73 g, 68%) as a pure ( $^1\text{H}$  NMR, 400 MHz) solid: FTIR ( $\text{CH}_2\text{Cl}_2$  cast) 3388  $\text{cm}^{-1}$ ;  $^1\text{H}$  NMR ( $\text{CDCl}_3$ , 400 MHz)  $\delta$  3.27–3.52 (m, 6 H), 3.67 (br s, 1 H), 4.00 (br s, 1 H), 4.17 (dd,  $J$  = 12.2, 5.8 Hz, 1 H), 4.32 (d,  $J$  = 7.1 Hz, 1 H), 4.38 (dd,  $J$  = 12.2, 4.5 Hz, 1 H), 4.72 (br s, 1 H), 5.20 (d,  $J$  = 10.6 Hz, 1 H), 5.33 (d,  $J$  = 17.2 Hz, 1 H), 5.91–6.05 (m, 1 H), 7.16–7.38 (m, 9 H), 7.38–7.58 (m, 6 H);  $^{13}\text{C}$  NMR ( $\text{CDCl}_3$ , 75.5 MHz)  $\delta$  64.1 (t'), 70.1 (t'), 71.5 (d'), 73.5 (d'), 74.5 (d'), 76.4 (d'), 86.8 (s'), 101.4 (d'), 118.1 (t'), 127.1 (d'), 127.9 (d'), 128.7 (d'), 134.0 (d'), 143.8 (s'); exact mass  $m/z$  calcd for  $\text{C}_{28}\text{H}_{30}\text{O}_6$  462.20425, found 462.20517.

**2-Propenyl 2,3,4-Tris-O-(phenylmethyl)-6-O-(triphenylmethyl)- $\beta$ -D-glucopyranose (36).**

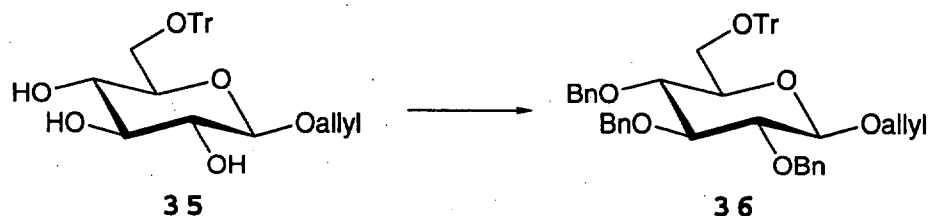

Triol **35** (17.2 g, 37.2 mmol), powdered NaOH (30 g, 0.75 mol), and BnCl (200 mL, 1.74 mol) were heated at 120 °C with mechanical stirring for 1 h. Another portion of powdered NaOH (30 g, 0.75 mol) was then added and stirring and heating were continued for 36 h. The mixture was cooled, diluted with water (200 mL), and extracted with Et<sub>2</sub>O (4 x 200 mL). The combined organic extracts were washed with brine (200 mL), dried, and evaporated. Flash chromatography of the residue over silica gel (8 x 24 cm), using 1:10 EtOAc-hexane, gave **36** (23.8 g, 87%) as a pure (<sup>1</sup>H NMR, 400 MHz) solid: FTIR (CH<sub>2</sub>Cl<sub>2</sub> cast) unexceptional; <sup>1</sup>H NMR (CDCl<sub>3</sub>, 400 MHz) δ 3.27 (dd, *J* = 9.3, 3.6 Hz, 1 H), 3.37-3.47 (m, 1 H), 3.54-3.68 (m, 3 H), 3.76-3.89 (m, 1 H), 4.28 (dd, *J* = 10.6, 4.6 Hz, 1 H), 4.40 (d, *J* = 9.3 Hz, 1 H), 4.48-4.60 (m, 2 H), 4.73 (d, *J* = 9.6 Hz, 1 H), 4.76-4.86 (m, 2 H), 4.94 (d, *J* = 9.9 Hz, 1 H), 5.05 (d, *J* = 9.9 Hz, 1 H), 5.27 (d, *J* = 9.6 Hz, 1 H), 5.43 (d, *J* = 16.6 Hz, 1 H), 6.00-6.13 (m, 1 H), 6.84-6.97 (m, 2 H), 7.10-7.48 (m, 22 H), 7.48-7.66 (m, 6 H); <sup>13</sup>C NMR (CDCl<sub>3</sub>, 75.5 MHz) δ 62.5 (t'), 70.1 (t'), 74.7 (d'), 75.0 (t'), 75.0 (t'), 76.0 (t'), 78.0 (d'), 82.6 (d'), 84.8 (d'), 86.4 (s'), 102.8 (d'), 117.4 (t'), 127.0 (d'), 127.3 (d'), 127.7 (d'), 127.8 (d'), 127.9 (d'), 128.1 (d'), 128.2 (d'), 128.2 (d'), 128.4 (d'), 128.9 (d'), 134.2 (d'), 137.9 (s'), 138.6 (s'), 144.0 (s'); mass (FAB) *m/z* calcd for C<sub>49</sub>H<sub>48</sub>NaO<sub>6</sub> (M + Na) 755.3, found 755.3.

**2,3,4-Tris-O-(phenylmethyl)-6-O-(triphenylmethyl)-D-glucopyranose (37).**

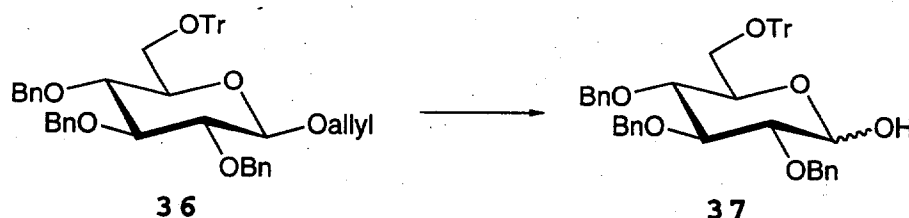

DMSO (60.0 mL) was added in one portion to a stirred suspension of **36** (16.7 g, 22.8 mmol) and *t*-BuOK (10.0 g, 89.1

mmol). The mixture was stirred to dissolve the solids and was then heated at 100 °C for 1 h with continued stirring. The resulting solution was cooled to room temperature, poured into water (200 mL), and extracted with Et<sub>2</sub>O (4 x 50 mL). The combined organic extracts were washed with water (1 x 40 mL) and evaporated. The solid residue was dissolved in 10:1 acetone-water (50 mL), and HgO (8.38 g, 38.7 mmol) was added (stirring). A solution of HgCl<sub>2</sub> (10.5 g, 38.7 mmol) in 10:1 acetone-water (20 mL) was added dropwise, and stirring was continued for 4 h. The mixture was filtered through a pad (5 x 4 cm) of Celite, using acetone (100 mL) as a rinse. The combined filtrates were evaporated and the residue was dissolved in Et<sub>2</sub>O (200 mL), washed with 20% aqueous NaI (1 x 200 mL) and brine (100 mL), dried, and evaporated. Flash chromatography of the residue over silica gel (8 x 25 cm), using 2:8 EtOAc-hexane, gave **37** (14.0 g, 88%) as a pure (<sup>1</sup>H NMR, 300 MHz), gummy solid, which was a mixture of epimers: FTIR (CH<sub>2</sub>Cl<sub>2</sub> cast) 3439 (br) cm<sup>-1</sup>; <sup>1</sup>H NMR (CDCl<sub>3</sub>, 300 MHz) δ 2.92 (br s, 0.66 H), 3.14 (br d, *J* = 5.3 Hz, 0.34 H), 3.23 (dd, *J* = 3.3, 3.3 Hz, 0.34 H), 3.26 (dd, *J* = 3.3, 3.3 Hz, 0.66 H), 3.43-3.75 (m, 2.66 H), 3.75-3.87 (m, 1 H), 3.95 (dd, *J* = 9.0, 9.0 Hz, 0.66 H), 4.06 (br d, *J* = 10.5 Hz, 0.66 H), 4.36 (d, *J* = 10.5, 1 H), 4.66-4.96 (m, 5 H), 5.02 (d, *J* = 11.3 Hz, 0.34 H), 5.39 (dd, *J* = 2.8, 2.8 Hz, 0.66 H), 6.83-6.93 (m, 2 H), 7.12-7.42 (m, 22 H), 7.42-7.53 (m, 6 H); <sup>13</sup>C NMR (CDCl<sub>3</sub>, 75.5 MHz) δ 62.3 (t'), 62.6 (t'), 70.6 (d'), 73.3 (t'), 74.8 (t'), 74.9 (t'), 75.9 (t'), 75.9 (t'), 77.8 (d'), 80.5 (d'), 81.9 (d'), 83.4 (d'), 84.6 (d'), 86.3 (s'), 86.6 (s'), 91.2 (d'), 97.6 (d'), 126.9 (d'), 127.5 (d'), 127.6 (d'), 127.7 (d'), 127.8 (d'), 127.9 (d'), 128.1 (d'), 128.1 (d'), 128.1 (d'), 128.4 (d'), 128.4 (d'), 128.5 (d'), 128.8 (d'), 137.9 (s'), 138.0 (s'), 138.5 (s'), 138.6 (s'), 143.8 (s'), 143.9 (s'); mass (FAB) *m/z* calcd for C<sub>46</sub>H<sub>44</sub>NaO<sub>6</sub> (M + Na) 715.3, found 715.2. Anal. calcd for C<sub>46</sub>H<sub>44</sub>O<sub>6</sub>: C, 79.73; H, 6.41. Found: C, 79.49; H, 6.50.

**2,3,4-Tris-O-(phenylmethyl)-6-O-(triphenylmethyl)-D-glucitol (38).**

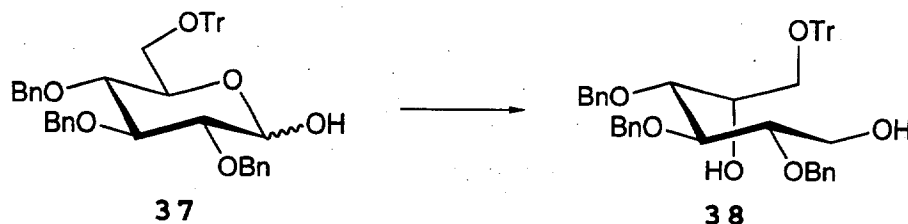

LiAlH<sub>4</sub> (2.42 g, 63.8 mmol) was added in five portions to a stirred and cooled (0 °C) solution of **37** (16.9 g, 24.4 mmol) in THF (300 mL). The cold bath was removed, stirring was continued for 4 h, and the mixture was then cooled to 0 °C. Water (1.0 mL), 15% aqueous NaOH (1.0 mL), and water (1.0 mL) were added sequentially with stirring. The cold bath was removed, stirring was continued for 30 min, and the mixture was then filtered through a pad (8 x 3 cm) of Celite, using Et<sub>2</sub>O (500 mL) as a rinse. Evaporation of the combined filtrates, and flash chromatography of the residue over silica gel (8 x 25 cm), using 3:7 EtOAc-hexane, gave **38** (16.2 g, 95%) as a pure (<sup>1</sup>H NMR, 400 MHz) solid: [α]<sub>D</sub> = 3.10 (c 2.03, CH<sub>2</sub>Cl<sub>2</sub>); FTIR (CH<sub>2</sub>Cl<sub>2</sub> cast) 3457 cm<sup>-1</sup>; <sup>1</sup>H NMR (CDCl<sub>3</sub>, 400 MHz) δ 2.09 (t, *J* = 5.8 Hz, 1 H), 3.09 (d, *J* = 5.4 Hz, 1 H), 3.32 (dd, *J* = 9.6, 4.6 Hz, 1 H), 3.37 (dd, *J* = 9.6, 4.0 Hz, 1 H), 3.53–3.61 (m, 1 H), 3.66–3.75 (m, 1 H), 3.76–3.84 (m, 2 H), 3.87 (dd, *J* = 6.6, 2.6 Hz, 1 H), 4.03–4.11 (m, 1 H), 4.42 (d, *J* = 12.0 Hz, 1 H), 4.45 (d, *J* = 12.0 Hz, 1 H), 4.53 (d, *J* = 13.0 Hz, 1 H), 4.61 (d, *J* = 13.4 Hz, 1 H), 4.66 (d, *J* = 13.4 Hz, 1 H), 4.68 (d, *J* = 13.0 Hz, 1 H), 7.07–7.16 (m, 2 H), 7.20–7.38 (m, 22 H), 7.40–7.51 (m, 6 H); <sup>13</sup>C NMR (CDCl<sub>3</sub>, 75.5 MHz) δ 61.9 (t'), 64.7 (t'), 70.7 (d'), 72.9 (t'), 73.0 (t'), 74.4 (t'), 77.0 (d'), 79.3 (d'), 79.5 (d'), 86.7 (s'), 127.1 (d'), 127.3 (d'), 127.8 (d'), 127.8 (d'), 127.85 (d'), 127.90 (d'), 127.94 (d'), 128.2 (d'), 128.2 (d'), 128.3 (d'), 128.3 (d'), 128.4 (d'), 128.4 (d'), 128.5 (d'), 128.7 (d'), 128.85 (d'), 128.87 (d'), 129.1 (d'), 137.6 (s'), 137.8 (s'), 138.2 (s'), 143.8 (s'); mass (FAB) *m/z* calcd for C<sub>46</sub>H<sub>46</sub>NaO<sub>6</sub> (M + Na) 717.3, found 717.2.

**1-O-[(1,1-Dimethylethyl)dimethylsilyl]-2,3,4-tris-O-**

**(phenylmethyl)-6-O-(triphenylmethyl)-D-glucitol (39).**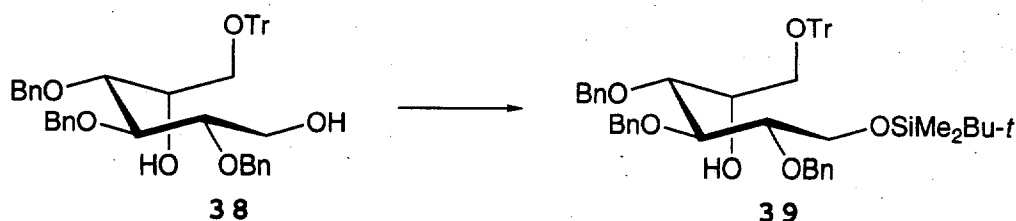

Et<sub>3</sub>N (5.13 mL, 36.8 mmol) was added in one portion to a stirred solution of **38** (16.1 g, 23.2 mmol), DMAP (710 mg, 5.81 mmol), and *t*-BuMe<sub>2</sub>SiCl (5.44 g, 36.1 mmol) in CH<sub>2</sub>Cl<sub>2</sub> (500 mL). Stirring was continued for 16 h, CH<sub>2</sub>Cl<sub>2</sub> (200 mL) was added, and the mixture was washed with brine (2 x 200 mL), dried, and evaporated. Flash chromatography of the residue over silica gel (8 x 25 cm), using 1:10 EtOAc-hexane, gave **39** (18.3 g, 95%) as a pure (<sup>1</sup>H NMR, 300 MHz), gummy solid: [α]<sub>D</sub> = 3.35 (*c* 1.55, CH<sub>2</sub>Cl<sub>2</sub>); FTIR (CH<sub>2</sub>Cl<sub>2</sub> cast) unexceptional; <sup>1</sup>H NMR (CDCl<sub>3</sub>, 300 MHz) δ 0.02 (s, 6 H), 0.90 (s, 9 H), 3.11 (dd, *J* = 4.9, 1.2 Hz, 1 H), 3.27–3.42 (m, 2 H), 3.67–3.84 (m, 4 H), 3.84–3.93 (m, 1 H), 3.98–4.10 (m, 1 H), 4.44 (d, *J* = 11.4 Hz, 1 H), 4.47 (d, *J* = 11.4 Hz, 1 H), 4.54 (d, *J* = 11.0 Hz, 1 H), 4.63 (d, *J* = 11.2 Hz, 2 H), 4.73 (d, *J* = 11.0 Hz, 1 H), 7.04–7.16 (m, 2 H), 7.16–7.40 (m, 22 H), 7.40–7.56 (m, 6 H); <sup>13</sup>C NMR (CDCl<sub>3</sub>, 75.5 MHz) δ -5.39 (q'), -5.35 (q'), 18.2 (s'), 25.9 (q'), 63.2 (t'), 64.9 (t'), 71.1 (d'), 73.0 (t'), 73.2 (t'), 74.1 (t'), 77.2 (d'), 78.3 (d'), 79.8 (d'), 86.6 (s'), 127.0 (d'), 127.5 (d'), 127.7 (d'), 127.8 (d'), 127.95 (d'), 128.03 (d'), 128.17 (d'), 128.19 (d'), 128.3 (d'), 128.4 (d'), 128.8 (d'), 138.09 (s'), 138.12 (s'), 138.6 (s'), 144.0 (s'); mass (FAB) *m/z* calcd for C<sub>52</sub>H<sub>60</sub>NaO<sub>6</sub>Si (*M* + Na) 831.4, found 831.4. Anal. Calcd for C<sub>52</sub>H<sub>60</sub>O<sub>6</sub>Si: C, 77.19; H, 7.48. Found: C, 77.08; H, 7.58.

**1-O-[(1,1-Dimethylethyl)dimethylsilyl]-2,3,4,5-tetrakis-O-(phenylmethyl)-6-O-(triphenylmethyl)-D-glucitol (40).**



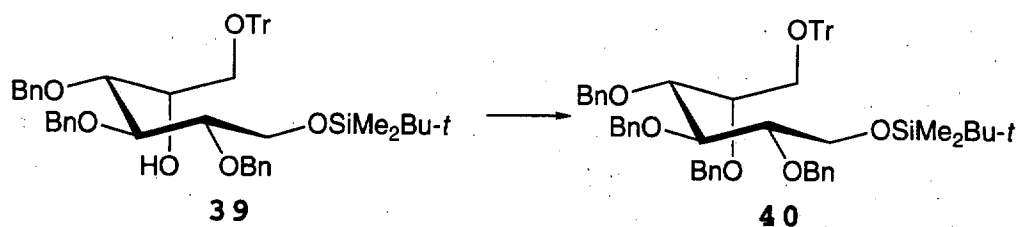

NaH (80% dispersion in oil, 1.48 g, 49.3 mmol) was added in six portions to a stirred and cooled (0 °C) solution of **39** (18.2 g, 22.5 mmol) in THF (400 mL). The resulting mixture was stirred for 30 min and then BnBr (5.88 mL, 49.4 mmol) was added neat in one portion. The cold bath was removed and the mixture was stirred for 1 h and then refluxed for 14 h. The resulting mixture was cooled (0 °C) and quenched with MeOH (60 mL), diluted with brine (200 mL), and extracted with Et<sub>2</sub>O (3 x 500 mL). The combined organic extracts were washed with brine (1 x 150 mL), dried, and evaporated. Flash chromatography of the residue over silica gel (8 x 25 cm), using 1:20 EtOAc-hexane, gave **40** (19.2 g, 94%) as a pure (<sup>1</sup>H NMR, 300 MHz), thick syrup: [α]<sub>D</sub> = -3.23 (c 3.5, CH<sub>2</sub>Cl<sub>2</sub>); FTIR (CH<sub>2</sub>Cl<sub>2</sub> cast) unexceptional; <sup>1</sup>H NMR (CDCl<sub>3</sub>, 300 MHz) δ 0.07 (s, 3 H), 0.08 (s, 3 H), 0.96 (s, 9 H), 3.47 (dd, *J* = 10.2, 5.1 Hz, 1 H), 3.66 (dd, *J* = 10.0, 2.6 Hz, 1 H), 3.71-3.84 (m, 3 H), 3.87-3.96 (m, 2 H), 4.17 (dd, *J* = 5.5, 5.5 Hz, 1 H), 4.47 (d, *J* = 11.5 Hz, 1 H), 4.61-4.73 (m, 5 H), 4.78 (d, *J* = 11.5 Hz, 1 H), 4.81 (d, *J* = 11.7 Hz, 1 H), 7.10-7.20 (m, 2 H), 7.20-7.46 (m, 27 H), 7.51-7.64 (m, 6 H); <sup>13</sup>C NMR (CDCl<sub>3</sub>, 75.5 MHz) δ -5.4 (q'), 18.2 (s'), 26.0 (q'), 63.2 (t'), 64.0 (t'), 72.2 (t'), 73.2 (t'), 73.8 (t'), 74.5 (t'), 78.6 (d'), 79.6 (d'), 80.7 (d'), 86.8 (s'), 126.9 (d'), 127.2 (d'), 127.3 (d'), 127.3 (d'), 127.8 (d'), 127.9 (d'), 128.05 (d'), 128.12 (d'), 128.16 (d'), 128.23 (d'), 128.9 (d'), 138.7 (s'), 138.79 (s'), 138.84 (s'), 139.0 (s'), 144.1 (s'); mass (FAB) *m/z* calcd for C<sub>59</sub>H<sub>66</sub>NaO<sub>6</sub>Si (*M* + Na) 921.5, found 921.4.

**2,3,4,5-Tetrakis-O-(phenylmethyl)-6-O-(triphenylmethyl)-D-glucitol (41).**

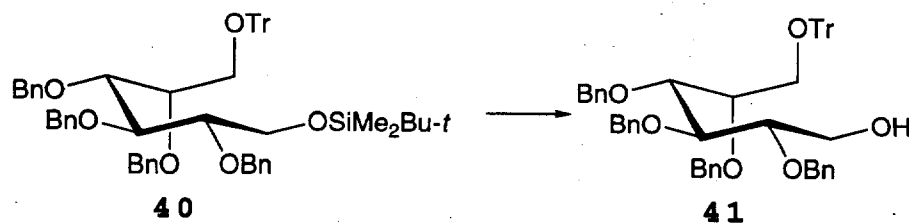

TBAF (21.6 mL, 1 M in THF, 21.6 mmol) was added in one portion to a stirred solution of **40** (19.1 g, 21.3 mmol) in THF (410 mL). Stirring was continued for 4 h, the mixture was diluted with Et<sub>2</sub>O (200 mL), and washed with water (1 x 150 mL). The aqueous phase was extracted with Et<sub>2</sub>O (2 x 100 mL) and the combined organic extracts were washed with brine (1 x 150 mL), dried, and evaporated. Flash chromatography of the residue over silica gel (8 x 20 cm), using 2:8 EtOAc-hexane, gave **41** (16.2 g, 97%) as a pure (<sup>1</sup>H NMR, 400 MHz) solid: [α]<sub>D</sub> = -9.08 (c 9.08, CH<sub>2</sub>Cl<sub>2</sub>); FTIR (CH<sub>2</sub>Cl<sub>2</sub> cast) 3457 cm<sup>-1</sup>; <sup>1</sup>H NMR (CDCl<sub>3</sub>, 400 MHz) δ 2.08 (br s, 1 H), 3.42 (dd, *J* = 10.2, 5.3 Hz, 1 H), 3.57 (dd, *J* = 10.2, 2.9 Hz, 2 H), 3.65 (ddd, *J* = 4.9, 4.9, 4.9 Hz, 1 H), 3.68–3.77 (m, 1 H), 3.83–3.89 (m, 2 H), 4.05 (dd, *J* = 4.9, 4.9 Hz, 1 H), 4.43 (d, *J* = 11.4 Hz, 1 H), 4.54–4.64 (m, 6 H), 4.74 (d, *J* = 11.4 Hz, 1 H), 7.05–7.14 (m, 2 H), 7.18–7.40 (m, 26 H), 7.40–7.54 (m, 7 H); <sup>13</sup>C NMR (CDCl<sub>3</sub>, 75.5 MHz) δ 61.8 (t'), 63.0 (t'), 72.0 (t'), 72.3 (t'), 73.5 (t'), 74.3 (t'), 78.3 (d'), 78.96 (d'), 79.04 (d'), 79.07 (d'), 86.8 (s'), 126.8 (d'), 127.2 (d'), 127.41 (d'), 127.46 (d'), 127.6 (d'), 127.71 (d'), 127.74 (d'), 128.0 (d'), 128.1 (d'), 128.2 (d'), 128.6 (d'), 129.0 (d'), 138.17 (s'), 138.21 (s'), 138.4 (s'), 143.8 (s'); exact mass *m/z* calcd for C<sub>34</sub>H<sub>37</sub>O<sub>6</sub> (M - Ph<sub>3</sub>C) 541.25903, found 541.25931. Anal. Calcd for C<sub>53</sub>H<sub>52</sub>O<sub>6</sub>: C, 81.08; H, 6.68. Found: C, 81.06; H, 6.72.

**2,3,4,5-Tetrakis-O-(phenylmethyl)-6-O-(triphenylmethyl)-D-glucose (42).**

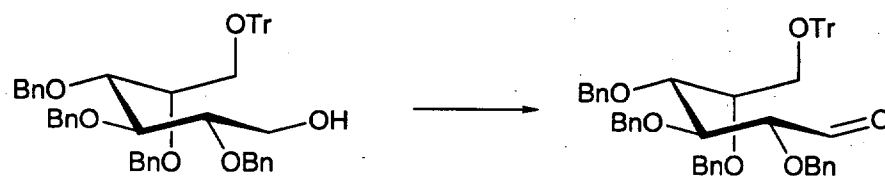

41

42

DMSO (1.05 mL, 14.8 mmol) was added dropwise to a stirred and cooled (-78 °C) solution of (COCl)<sub>2</sub> (0.96 mL, 11.0 mmol) in CH<sub>2</sub>Cl<sub>2</sub> (40 mL). After 20 min, **41** (2.89 g, 3.69 mmol) in CH<sub>2</sub>Cl<sub>2</sub> (12 mL) was added by syringe over 1 min. Stirring was continued for 30 min at -78 °C, and then Et<sub>3</sub>N (4.11 mL, 29.5 mmol) was added dropwise over 2 min. The cold bath was removed and stirring was continued for 6 h. The solution was diluted with water (2 mL) and CH<sub>2</sub>Cl<sub>2</sub> (50 mL), and the mixture was transferred to a separatory funnel. The organic phase was washed with brine (1 x 30 mL), dried, and evaporated. Flash chromatography of the residue over silica gel (3 x 25 cm), using 1:10 to 2:8 EtOAc-hexane, gave **42** (2.56 g, 89%) as a pure (<sup>1</sup>H NMR, 300 MHz) solid: [α]<sub>D</sub> = -3.64 (c 0.44, CH<sub>2</sub>Cl<sub>2</sub>); FTIR (CH<sub>2</sub>Cl<sub>2</sub> cast) 1728 cm<sup>-1</sup>; <sup>1</sup>H NMR (CDCl<sub>3</sub>, 300 MHz) δ 3.36 (dd, *J* = 10.2, 4.2 Hz, 1 H), 3.73 (dd, *J* = 10.0, 2.4 Hz, 1 H), 3.83-3.91 (m, 1 H), 3.92 (d, *J* = 5.0 Hz, 1 H), 4.15-4.25 (m, 2 H), 4.36-4.62 (m, 6 H), 4.81 (d, *J* = 11.8 Hz, 1 H), 4.85 (d, *J* = 11.8 Hz, 1 H), 6.88-6.98 (m, 2 H), 7.10-7.29 (m, 18 H), 7.31-7.42 (m, 9 H), 7.44-7.54 (m, 6 H), 9.72 (s, 1 H); <sup>13</sup>C NMR (CDCl<sub>3</sub>, 75.5 MHz) δ 62.6 (t'), 72.2 (t'), 73.2 (t'), 73.4 (t'), 74.0 (t'), 76.8 (d'), 78.7 (d'), 70.0 (d'), 81.2 (d'), 86.9 (s'), 127.0 (d'), 127.27 (d'), 127.33 (d'), 127.5 (d'), 127.8 (d'), 128.0 (d'), 128.1 (d'), 128.4 (d'), 128.5 (d'), 128.8 (d'), 137.5 (s'), 137.7 (s'), 137.8 (s'), 138.5 (s'), 143.9 (s'), 200.8 (d'); mass (FAB) *m/z* calcd for C<sub>53</sub>H<sub>50</sub>NaO<sub>6</sub> (M + Na) 805.4, found 805.4. Anal. Calcd for C<sub>53</sub>H<sub>50</sub>O<sub>6</sub>: C, 81.29; H, 6.44. Found: C, 81.25; H, 6.24.

**1,1-Dibromo-1,2-dideoxy-3,4,5,6-tetrakis-O-(phenylmethyl)-7-O-(triphenylmethyl)-D-gluco-hept-1-enitol (43).**

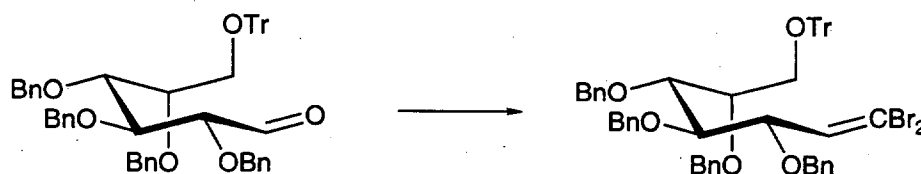

42

43

A solution of  $\text{CBr}_4$  (1.22 g, 3.68 mmol) in  $\text{CH}_2\text{Cl}_2$  (20 mL) was added at a fast dropwise rate to a stirred and cooled ( $-20\text{ }^\circ\text{C}$ ) solution of  $\text{Ph}_3\text{P}$  (0.96 g, 3.66 mmol) in  $\text{CH}_2\text{Cl}_2$  (20 mL). Stirring at  $-20\text{ }^\circ\text{C}$  was continued for 15 min, and then a solution of **42** (1.44 g, 1.84 mmol) and  $\text{Et}_3\text{N}$  (0.26 mL, 1.87 mmol) in  $\text{CH}_2\text{Cl}_2$  (20 mL) was added dropwise at  $-60\text{ }^\circ\text{C}$ . The cold bath was removed, stirring was continued for 30 min, and the mixture was filtered through a pad (3 x 3 cm) of flash chromatography silica gel, using  $\text{Et}_2\text{O}$  (50 mL) as a rinse. Evaporation of the combined filtrates, and flash chromatography of the residue over silica gel (1.5 x 20 cm), using 1:9  $\text{EtOAc}$ -hexane, gave **43** (1.31 g, 76%) as a pure ( $^1\text{H}$  NMR, 200 MHz), gummy solid:  $[\alpha]_D = 6.02$  (c 0.98  $\text{CH}_2\text{Cl}_2$ ); FTIR ( $\text{CH}_2\text{Cl}_2$  cast) unexceptional;  $^1\text{H}$  NMR ( $\text{CDCl}_3$ , 200 MHz)  $\delta$  3.46 (d,  $J = 4.0$  Hz, 2 H), 3.69–3.86 (m, 2 H), 4.14 (dd,  $J = 5.1, 5.1$  Hz, 1 H), 4.30 (dd,  $J = 7.9, 4.0$  Hz, 1 H), 4.42 (d,  $J = 11.7$  Hz, 1 H), 4.47 (d,  $J = 11.5$  Hz, 1 H), 4.55–4.82 [m, 6 H, including doublet at  $\delta$  4.75 ( $J = 11.5$  Hz, 1 H)], 6.66 (d,  $J = 7.9$  Hz, 1 H), 7.05–7.18 (m, 2 H), 7.18–7.42 (m, 27 H), 7.42–7.59 (m, 6 H);  $^{13}\text{C}$  NMR ( $\text{CDCl}_3$ , 75.5 MHz)  $\delta$  63.1 (t'), 71.3 (t'), 72.4 (t'), 74.2 (t'), 75.0 (t'), 78.8 (d'), 79.5 (d'), 79.7 (d'), 86.8 (s'), 92.6 (s'), 127.0 (d'), 127.3 (d'), 127.4 (d'), 127.5 (d'), 127.6 (d'), 127.8 (d'), 128.0 (d'), 128.1 (d'), 128.18 (d'), 128.24 (d'), 128.3 (d'), 128.4 (d'), 128.9 (d'), 137.3 (d'), 137.6 (s'), 138.3 (s'), 138.6 (s'), 138.7 (s'), 144.0 (s'); mass (FAB)  $m/z$  calcd for  $\text{C}_{54}\text{H}_{50}^{79}\text{Br}^{81}\text{BrNaO}_5$  ( $M + \text{Na}$ ) 961.2, found 961.6.

**1,2-Dideoxy-3,4,5,6-tetrakis-O-(phenylmethyl)-7-O-(triphenylmethyl)-D-gluco-hept-1-ynitol (**44**).**

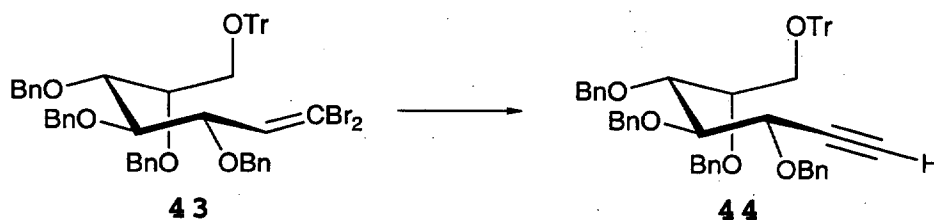

*n*-BuLi (2.5 M in hexane, 1.17 mL, 2.93 mmol) was added dropwise to a stirred and cooled (-78 °C) solution of **43** (1.31 g, 1.40 mmol) in THF (50 mL). Stirring at -78 °C was continued for 2 h, and then water (2 mL) was added. The cold bath was removed, stirring was continued for 20 min, and the resulting mixture was diluted with Et<sub>2</sub>O (20 mL) and washed with brine (2 x 10 mL). The organic extract was dried, and evaporated. Flash chromatography of the residue over silica gel (1.5 x 25 cm), using 2:8 EtOAc-hexane, gave **44** (0.844 g, 78%) as a pure (<sup>1</sup>H NMR, 360 MHz) solid: FTIR (CH<sub>2</sub>Cl<sub>2</sub> cast) 3283 cm<sup>-1</sup>; <sup>1</sup>H NMR (CDCl<sub>3</sub>, 360 MHz) δ 2.65 (d, *J* = 2.0 Hz, 1 H), 3.28 (dd, *J* = 10.3, 4.6 Hz, 1 H), 3.67 (dd, *J* = 10.3, 2.5 Hz, 1 H), 3.84-3.92 (m, 1 H), 4.08 (dd, *J* = 7.4, 3.2 Hz, 1 H), 4.35 (d, *J* = 11.6 Hz, 1 H), 4.39 (dd, *J* = 7.4, 3.2 Hz, 1 H), 4.47-4.58 [m, 4 H, including doublet at δ 4.56 (*J* = 11.7 Hz, 1 H)], 4.62 (d, *J* = 11.0 Hz, 1 H), 4.74 (d, *J* = 11.7 Hz, 1 H), 4.87 (d, *J* = 11.5 Hz, 1 H), 4.93 (d, *J* = 11.6 Hz, 1 H), 6.96-7.07 (m, 2 H), 7.14-7.40 (m, 27 H), 7.46-7.53 (m, 6 H); <sup>13</sup>C NMR (CDCl<sub>3</sub>, 75.5 MHz) δ 62.5 (t'), 71.4 (t'), 71.5 (d'), 71.9 (t'), 74.6 (t'), 74.9 (t'), 76.4 (s'), 78.5 (d'), 78.7 (d'), 80.9 (s'), 81.1 (d'), 86.7 (s'), 127.0 (d'), 127.25 (d'), 127.34 (d'), 127.8 (d'), 128.01 (d'), 128.04 (d'), 128.11 (d'), 128.2 (d'), 128.3 (d'), 128.4 (d'), 128.9 (d'), 137.5 (s'), 138.5 (s'), 138.7 (s'), 139.0 (s'), 144.1 (s'); mass (FAB) *m/z* calcd for C<sub>54</sub>H<sub>50</sub>O<sub>5</sub> 779.0, found 778.9.

**1,2,3-Trideoxy-4,5,6,7-tetrakis-*O*-(phenylmethyl)-1-(trimethylsilyl)-8-*O*-(triphenylmethyl)-*D*-gluco-oct-2-ynitol (**45**).**

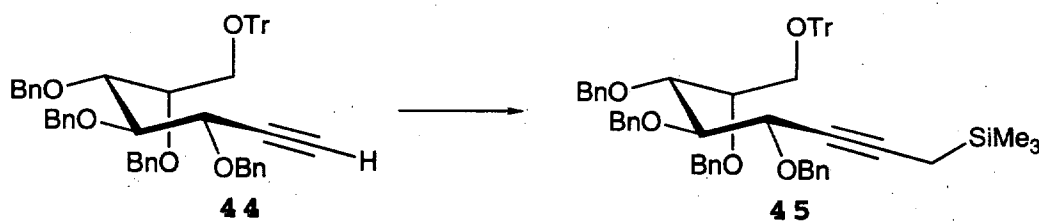

dropwise to a stirred and cooled ( $-78\text{ }^{\circ}\text{C}$ ) solution of **44** (0.509 g, 0.654 mmol) in THF (20 mL). Stirring at  $-78\text{ }^{\circ}\text{C}$  was continued for 1 h, and then  $\text{Me}_3\text{SiCH}_2\text{OSO}_2\text{CF}_3$  (0.17 mL, 0.850 mmol) and HMPA (0.40 mL, 2.30 mmol) were added rapidly, each in one portion. The cold bath was removed and stirring was continued for 10 h. The mixture was diluted with  $\text{Et}_2\text{O}$  (20 mL) and washed with brine (1 x 20 mL). The aqueous phase was extracted with  $\text{Et}_2\text{O}$  (2 x 20 mL) and the combined organic extracts were dried and evaporated. Flash chromatography of the residue over silica gel (1.5 x 20 cm), using 1:10  $\text{EtOAc}$ -hexane, gave **45** (0.441 g, 78%) as a pure ( $^1\text{H}$  NMR, 300 MHz) solid: FTIR ( $\text{CH}_2\text{Cl}_2$  cast) unexceptional;  $^1\text{H}$  NMR ( $\text{CDCl}_3$ , 300 MHz)  $\delta$  0.27 (s, 9 H), 1.73 (dd,  $J = 1.9, 1.9\text{ Hz}$ , 2 H), 3.36 (dd,  $J = 10.2, 4.4\text{ Hz}$ , 1 H), 3.74 (dd,  $J = 10.2, 2.0\text{ Hz}$ , 1 H), 3.92-4.01 (m, 1 H), 4.13 (dd,  $J = 7.6, 3.5\text{ Hz}$ , 1 H), 4.38 (d,  $J = 11.7\text{ Hz}$ , 1 H), 4.47 (dd,  $J = 7.6, 2.8\text{ Hz}$ , 1 H), 4.52-4.67 [m, 4 H, including doublet at  $\delta$  4.56 ( $J = 11.0\text{ Hz}$ , 1 H)], 4.71 (d,  $J = 11.0\text{ Hz}$ , 1 H), 4.81 (d,  $J = 11.7\text{ Hz}$ , 1 H), 4.95 (d,  $J = 11.6\text{ Hz}$ , 1 H), 5.04 (d,  $J = 11.7\text{ Hz}$ , 1 H), 7.02-7.12 (m, 2 H), 7.20-7.50 (m, 27 H), 7.50-7.62 (m, 6 H);  $^{13}\text{C}$  NMR ( $\text{CDCl}_3$ , 75.5 MHz)  $\delta$  -1.8 (q'), 7.4 (t'), 62.7 (t'), 71.0 (t'), 71.9 (s'), 72.4 (d'), 74.68 (t'), 74.72 (t'), 75.9 (t'), 78.5 (d'), 79.1 (d'), 81.8 (d'), 86.7 (s'), 87.0 (s'), 126.9 (d'), 127.1 (d'), 127.19 (d'), 127.21 (d'), 127.23 (d'), 127.6 (d'), 127.7 (d'), 127.8 (d'), 127.99 (d'), 128.02 (d'), 128.1 (d'), 128.2 (d'), 128.25 (d'), 128.33 (d'), 128.9 (d'), 138.2 (s'), 138.7 (s'), 138.9 (s'), 139.3 (s'), 144.2 (s'); exact mass  $m/z$  calcd for  $\text{C}_{32}\text{H}_{37}\text{O}_4\text{Si}$  (M - H -  $\text{Ph}_3\text{C}$  - OBn) 513.24609, found 513.24569.

**1,2,3-Trideoxy-4,6,5,7-tetrakis-O-(phenylmethyl)-1-(trimethylsilyl)-D-gluco-oct-2-ynitol (46).**

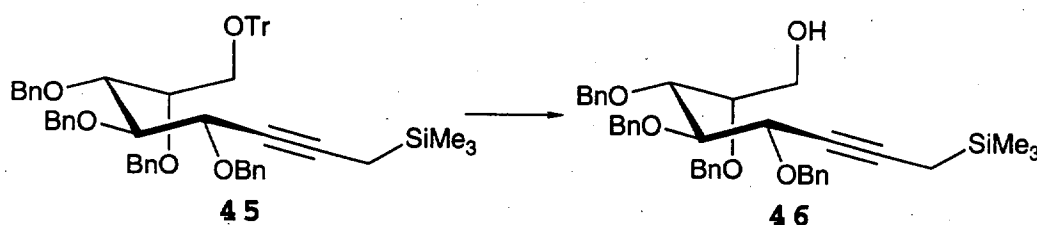

CSA (12.0 mg, 0.052 mmol) in MeOH (2 mL) was added in one portion to a stirred solution of **45** (0.409 g, 0.473 mmol) in CH<sub>2</sub>Cl<sub>2</sub> (20 mL). Stirring was continued for 24 h, Et<sub>3</sub>N (1 mL) was added, and the solution was evaporated. Flash chromatography of the residue over silica gel (1.5 x 20 cm), using 2:8 EtOAc-hexane, gave **46** (0.276 g, 94%) as a pure (<sup>1</sup>H NMR, 300 MHz), thick syrup: FTIR (CH<sub>2</sub>Cl<sub>2</sub> cast) 3474, 2212 cm<sup>-1</sup>; <sup>1</sup>H NMR (CDCl<sub>3</sub>, 300 MHz) δ 0.19 (s, 9 H), 1.62 (dd, *J* = 2.3, 2.3 Hz, 2 H), 2.08 (br s, 1 H), 3.73-3.86 (m, 2 H), 3.87-3.97 (m, 2 H), 4.21-4.28 (m, 1 H), 4.37 (d, *J* = 11.5 Hz, 1 H), 4.48-4.68 (m, 4 H), 4.79 (d, *J* = 2.5 Hz, 2 H), 4.90 (dd, *J* = 11.5, 2.5 Hz, 1 H), 5.00 (dd, *J* = 11.7, 2.2 Hz, 1 H), 7.19-7.44 (m, 20 H); <sup>13</sup>C NMR (CDCl<sub>3</sub>, 75.5 MHz) δ -1.8 (q'), 7.4 (t'), 60.3 (t'), 71.1 (t'), 71.4 (t'), 72.1 (d'), 74.7 (t'), 75.2 (t'), 75.4 (s'), 79.2 (d'), 79.3 (d'), 81.6 (d'), 87.2 (s'), 127.4 (d'), 127.55 (d'), 127.58 (d'), 127.66 (d'), 127.69 (d'), 128.01 (d'), 128.05 (d'), 128.12 (d'), 128.2 (d'), 128.3 (d'), 128.39 (d'), 128.44 (d'), 138.0 (s'), 138.3 (s'), 138.5 (s'), 138.9 (s'); exact mass *m/z* calcd for C<sub>25</sub>H<sub>31</sub>O<sub>4</sub>Si (M - H - Bn - OBn) 423.19916, found 423.19960.

**6,7,8-Trideoxy-2,3,4,5-tetrakis-O-(phenylmethyl)-8-(trimethylsilyl)-L-gulo-oct-6-ynose (27).**

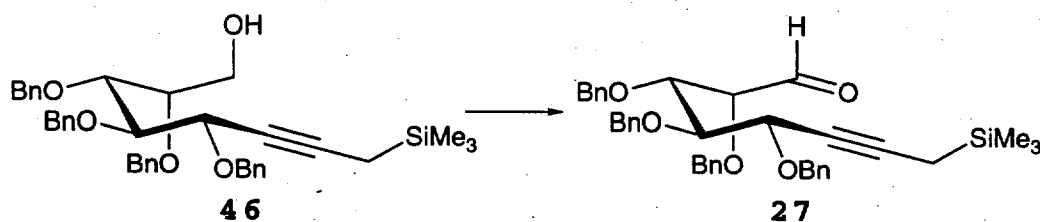

DMSO (0.14 mL, 1.97 mmol) was added dropwise to a stirred and cooled solution (-78 °C) of (COCl)<sub>2</sub> (0.13 mL, 1.49 mmol) in CH<sub>2</sub>Cl<sub>2</sub> (10 mL). After 20 min, **46** (0.302 g, 0.486 mmol) in CH<sub>2</sub>Cl<sub>2</sub> (5 mL) was added by syringe over 1 min. Stirring was continued for 30 min at -78 °C, and then Et<sub>3</sub>N (0.54 mL, 3.86 mmol) was added dropwise over 2 min. After a further 30 min, the cold bath was

removed and stirring was continued for 6 h. The mixture was diluted with water (2 mL) and  $\text{CH}_2\text{Cl}_2$  (15 mL), and transferred to a separatory funnel. The organic phase was washed with brine (20 mL), dried, and evaporated. Flash chromatography of the residue over silica gel (1.5 x 15 cm), using 1:10 to 2:8 EtOAc-hexane, gave **27** (0.253 g, 84%) as a pure ( $^1\text{H}$  NMR, 360 MHz), colorless oil: FTIR ( $\text{CH}_2\text{Cl}_2$  cast) 2213, 1735  $\text{cm}^{-1}$ ;  $^1\text{H}$  NMR ( $\text{CDCl}_3$ , 360 MHz)  $\delta$  0.17 (s, 9 H), 1.58 (d,  $J = 2.1$  Hz, 2 H), 3.89 (dd,  $J = 6.9, 3.5$  Hz, 1 H), 4.08 (dd,  $J = 4.3, 1.6$  Hz, 1 H), 4.29 (d,  $J = 11.4$  Hz, 1 H), 4.31 (dd,  $J = 4.3, 4.3$  Hz, 1 H), 4.49–4.70 (m, 6 H), 4.87 (d,  $J = 11.4$  Hz, 1 H), 4.94 (d,  $J = 11.2$  Hz, 1 H), 7.23–7.38 (m, 20 H), 9.69 (d,  $J = 1.4$  Hz, 1 H);  $^{13}\text{C}$  NMR ( $\text{CDCl}_3$ , 75.5 MHz)  $\delta$  -1.8 (q'), 7.4 (t'), 71.0 (t'), 71.8 (d'), 72.4 (t'), 74.6 (t'), 75.0 (t'), 75.1 (s'), 80.9 (d'), 81.5 (d'), 83.9 (d'), 87.2 (s'), 127.6 (d'), 127.7 (d'), 127.8 (d'), 127.9 (d'), 128.1 (d'), 128.2 (d'), 128.3 (d'), 128.39 (d'), 128.43 (d'), 137.5 (s'), 137.9 (s'), 138.4 (s'), 201.3 (d'); exact mass  $m/z$  calcd for  $\text{C}_{39}\text{H}_{44}\text{O}_5\text{Si}$  620.29578, found 620.29554.

**Trimethyl[7-[(tetrahydro-2H-pyran-2-yl)oxy]-1-heptynyl]silane (48).**

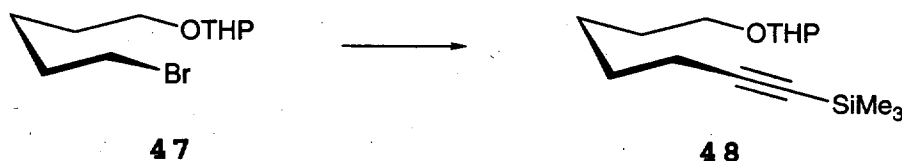

$n\text{-BuLi}$  (2.5 M in hexane, 2.52 mL, 6.30 mmol) was added dropwise to a stirred and cooled ( $-78^\circ\text{C}$ ) solution of trimethylsilylacetylene (0.647 g, 6.60 mmol) in THF (20 mL). Stirring at  $-78^\circ\text{C}$  was continued for 15 min, and then a mixture of **47** (1.51 g, 6.01 mmol) and HMPA (1.5 mL, 8.63 mmol) was added in one portion. The cold bath was removed and stirring was continued for 15 h. The mixture was then quenched with saturated aqueous  $\text{NH}_4\text{Cl}$  (20 mL) at  $-78^\circ\text{C}$ , and extracted with hexane (3 x 20 mL). The combined organic extracts were washed with water (15 mL) and



brine (20 mL), dried, and evaporated. Flash chromatography of the residue over silica gel (2 x 25 cm), using 1:10 EtOAc-hexane, gave **48** [0.975 g, 94% after correction for recovered **47** (35%)] as a pure ( $^1\text{H}$  NMR, 200 MHz), colorless oil: FTIR ( $\text{CH}_2\text{Cl}_2$  cast)  $2175\text{ cm}^{-1}$ ;  $^1\text{H}$  NMR ( $\text{CDCl}_3$ , 200 MHz),  $\delta$  0.11 (s, 9 H), 1.35–1.90 (m, 12 H), 2.21 (t,  $J = 6.8\text{ Hz}$ , 2 H), 3.38 (dt,  $J = 9.6, 6.2\text{ Hz}$ , 1 H), 3.42–3.54 (m, 1 H), 3.72 (dt,  $J = 9.6, 6.2\text{ Hz}$ , 1 H), 3.77–3.90 (m, 1 H), 4.56 (dd,  $J = 3.6, 3.6\text{ Hz}$ , 1 H);  $^{13}\text{C}$  NMR ( $\text{CDCl}_3$ , 75.5 MHz)  $\delta$  0.2 (q'), 19.6 (t'), 19.8 (t'), 25.5 (t'), 28.5 (t'), 29.3 (t'), 30.8 (t'), 62.2 (t'), 67.4 (t'), 84.4 (s'), 98.8 (d'), 107.4 (s'); exact mass  $m/z$  calcd for  $\text{C}_{15}\text{H}_{28}\text{O}_2\text{Si}$  268.18585, found 268.18529.

**2-(6-Heptynyloxy)tetrahydro-2H-pyran (49).**

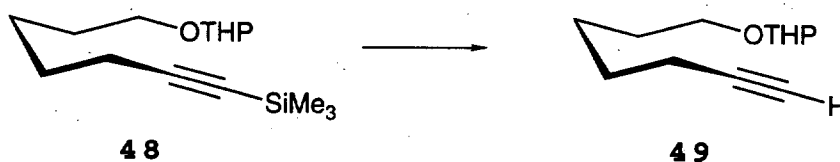

$\text{K}_2\text{CO}_3$  (0.677 g, 4.90 mmol) was added in one portion to a stirred and cooled ( $0\text{ }^\circ\text{C}$ ) solution of **48** (1.31 g, 4.89 mmol) in 2:1 MeOH-THF (51 mL). The resulting mixture was stirred for 5 h, the cold bath was removed, and stirring was continued for 12 h. The mixture was then filtered through a pad (2 x 3 cm) of Celite, using  $\text{Et}_2\text{O}$  (50 mL) as a rinse. Evaporation of the combined filtrates, and flash chromatography of the residue over silica gel (2.5 x 20 cm), using 1:10 EtOAc-hexane, gave **49** (0.905 g, 94%) as a pure ( $^1\text{H}$  NMR, 200 MHz), colorless oil: FTIR ( $\text{CH}_2\text{Cl}_2$  cast) 3296,  $2117\text{ cm}^{-1}$ ;  $^1\text{H}$  NMR ( $\text{CDCl}_3$ , 200 MHz)  $\delta$  1.36–1.87 (m, 12 H), 1.91 (t,  $J = 2.5\text{ Hz}$ , 1 H), 2.17 (td,  $J = 6.6, 2.5\text{ Hz}$ , 2 H), 3.37 (dt,  $J = 9.6, 6.2\text{ Hz}$ , 1 H), 3.41–3.55 (m, 1 H), 3.72 (dt,  $J = 9.6, 6.2\text{ Hz}$ , 1 H), 3.76–3.92 (m, 1 H), 4.54 (d,  $J = 3.6, 3.6\text{ Hz}$ , 1 H);  $^{13}\text{C}$  NMR ( $\text{CDCl}_3$ , 75.5 MHz)  $\delta$  18.4 (t'), 19.7 (t'), 25.46 (t'), 25.52 (t'), 28.3 (t'), 29.3 (t'), 30.8 (t'), 62.3 (t'), 67.4 (t'), 68.2 (d'), 84.5 (s'), 98.9 (d'); exact mass  $m/z$  calcd for  $\text{C}_{12}\text{H}_{19}\text{O}_2$  (M - 1) 195.13850, found 195.13841.

**Trimethyl[8-[(tetrahydro-2H-pyran-2-yl)oxy]-2-octynyl]silane (50).<sup>57</sup>**

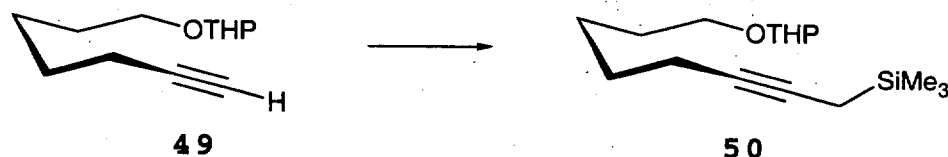

*n*-BuLi (2.5 M in hexane, 0.40 mL, 1.00 mmol) was added dropwise to a stirred and cooled (-78 °C) solution of **49** (0.200 g, 1.00 mmol) in THF (15 mL). Stirring at -78 °C was continued for 20 min, and then Me<sub>3</sub>SiCH<sub>2</sub>OSO<sub>2</sub>CF<sub>3</sub> (0.237 g, 1.00 mmol) was added in one portion, followed immediately by HMPA (0.3 mL), which was also added rapidly in one portion. The cold bath was removed and stirring was continued for 18 h. The resulting mixture was poured into water (25 mL) and extracted with hexane (3 x 25 mL). The combined organic extracts were dried and evaporated. Flash chromatography of the residue over silica gel (1 x 20 cm), using 1:20 EtOAc-hexane, gave **50** [0.215 g, 91% after correction for recovered **49** (18%)] as a pure (<sup>1</sup>H NMR, 400 MHz), colorless oil: FTIR (CH<sub>2</sub>Cl<sub>2</sub> cast) 2940, 2868, 1352 cm<sup>-1</sup>; <sup>1</sup>H NMR (CDCl<sub>3</sub>, 400 MHz) δ 0.07 (s, 9 H), 1.35-1.63 [m, including triplet (2 H) at δ 1.38, *J* = 2.6 Hz, 12 H], 1.64-1.73 (m, 1 H), 1.75-1.86 (m, 1 H), 2.13 (tt, *J* = 6.5, 2.4 Hz, 2 H), 3.36 (dt, *J* = 9.6, 6.8 Hz, 1 H), 3.43-3.51 (m, 1 H), 3.71 (dt, *J* = 9.6, 6.8 Hz, 1 H), 3.80-3.88 (m, 1 H), 4.55 (dd, *J* = 3.6, 3.6 Hz, 1 H); <sup>13</sup>C NMR (CDCl<sub>3</sub>, 75.5 MHz) δ -2.1 (q'), 6.9 (t'), 18.9 (t'), 19.6 (t'), 25.5 (t'), 29.31 (t'), 29.34 (t'), 30.8 (t'), 62.2 (t'), 67.5 (t'), 77.4 (s'), 78.7 (s'), 98.8 (d'); exact mass *m/z* calcd for C<sub>16</sub>H<sub>30</sub>O<sub>2</sub>Si 282.20151, found 282.20168.

**8-(Trimethylsilyl)-6-octyn-1-ol (51).<sup>57</sup>**

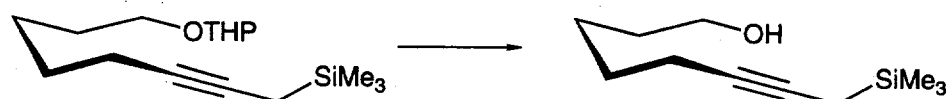

50

51

TsOH.H<sub>2</sub>O (20.0 mg, 0.105 mmol) was added to a stirred solution of **50** (0.860 g, 3.05 mmol) in 3:1 MeOH-H<sub>2</sub>O (200 mL), and the mixture was refluxed for 3 h, cooled, and concentrated. The resulting aqueous mixture was extracted with Et<sub>2</sub>O (3 x 30 mL), and the combined organic extracts were washed with saturated aqueous NaHCO<sub>3</sub> (20 mL), water (20 mL) and brine (20 mL), dried, and evaporated. Flash chromatography of the residue over silica gel (2 x 20 cm), using 2:8 EtOAc-hexane, gave **51** (0.560 g, 93%) as a pure (<sup>1</sup>H NMR, 200 MHz), colorless oil: FTIR (CH<sub>2</sub>Cl<sub>2</sub> cast) 3334 cm<sup>-1</sup>; <sup>1</sup>H NMR (CDCl<sub>3</sub>, 200 MHz) δ 0.04 (s, 9 H), 1.28-1.63 [m, including triplet (2 H) at δ 1.36, *J* = 2.6 Hz, 8 H], 2.01 (br s, 1 H), 2.11 (tt, *J* = 6.2, 2.2 Hz, 2 H), 3.57 (t, *J* = 6.4 Hz, 2 H); <sup>13</sup>C NMR (CDCl<sub>3</sub>, 75.5 MHz) δ -2.1 (q'), 6.9 (t'), 18.8 (t'), 24.9 (t'), 29.2 (t'), 32.3 (t'), 62.7 (t'), 77.5 (s'), 78.6 (s'); exact mass *m/z* calcd for C<sub>11</sub>H<sub>22</sub>OSi 198.14400, found 198.14457.

**8-(Trimethylsilyl)-6-octynal (28).**

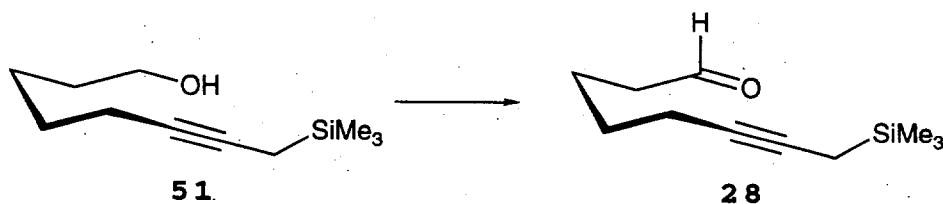

DMSO (0.067 mL, 0.95 mmol) was added to a stirred and cooled (-78 °C) solution of (COCl)<sub>2</sub> (0.063 mL, 0.72 mmol) in CH<sub>2</sub>Cl<sub>2</sub> (10 mL). Stirring at -78 °C was continued for 20 min, and then a solution of **51** (47.4 mg, 0.24 mmol) in CH<sub>2</sub>Cl<sub>2</sub> (2 mL) was added by syringe over 1 min. Stirring was continued for 30 min at -78 °C, and then Et<sub>3</sub>N (0.28 mL, 1.98 mmol) was added dropwise over 2 min. The cold bath was removed, and the mixture was stirred for 3 h, diluted with water (1 mL) and CH<sub>2</sub>Cl<sub>2</sub> (10 mL), and transferred to a separatory funnel. The organic phase was washed with brine (10 mL), dried, and evaporated. Flash chromatography of the residue

over silica gel (1 x 15 cm), using 1:10 EtOAc-hexane, gave **28** (37.5 mg, 80%) as a pure ( $^1\text{H}$  NMR, 300 MHz), colorless oil: FTIR ( $\text{CH}_2\text{Cl}_2$ , cast) 2718, 1727  $\text{cm}^{-1}$ ;  $^1\text{H}$  NMR ( $\text{CDCl}_3$ , 300 MHz)  $\delta$  0.07 (s, 9 H), 1.39 (t,  $J$  = 2.5 Hz, 2 H), 1.48 (tt,  $J$  = 7.5, 7.5 Hz, 2 H), 1.72 (tt,  $J$  = 7.5, 7.5 Hz, 2 H), 2.15 (tt,  $J$  = 7.5, 2.5 Hz, 2 H), 2.42 (tt,  $J$  = 7.5, 1.8 Hz, 2 H), 9.74 (t,  $J$  = 1.8 Hz, 1 H);  $^{13}\text{C}$  NMR ( $\text{CDCl}_3$ , 75.5 MHz)  $\delta$  -2.1 (q'), 6.9 (t'), 18.7 (t'), 21.2 (t'), 28.7 (t'), 43.4 (t'), 77.9 (s'), 78.0 (s'), 202.4 (d'); exact mass  $m/z$  calcd for  $\text{C}_{11}\text{H}_{20}\text{OSi}$  196.12834, found 196.12779.

**3-Phenyl-5-[(tetrahydro-2H-pyran-2-yl)oxy]-1-pentanol (53).**

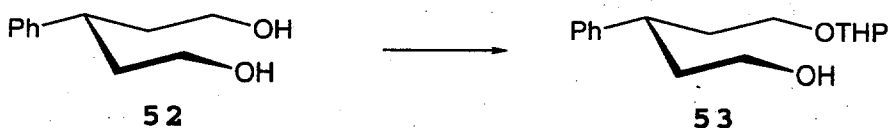

3,4-Dihydro-2H-pyran (2.48 mL, 27.8 mmol) and  $\text{TsOH} \cdot \text{H}_2\text{O}$  (30.0 mg, 0.174 mmol) were added to a stirred solution of **52**<sup>58</sup> (5.00 g, 27.8 mmol) in  $\text{Et}_2\text{O}$  (300 mL). Stirring was continued for 24 h, and the solution was washed with saturated aqueous  $\text{NaHCO}_3$  (50 mL), water (50 mL) and brine (50 mL), dried and evaporated. Flash chromatography of the residue over silica gel (3 x 25 cm), using 3:7 EtOAc-hexane, gave **53** [3.10 g, 66% after correction for recovered diol (36%)] as a colorless oil that was a mixture of two diastereoisomers ( $^1\text{H}$  NMR, 300 MHz): FTIR ( $\text{CH}_2\text{Cl}_2$  cast) 3424  $\text{cm}^{-1}$ ;  $^1\text{H}$  NMR ( $\text{CDCl}_3$ , 300 MHz)  $\delta$  1.39-2.09 (m, 11 H), 2.78-2.98 (m, 1 H), 3.09-3.32 (m, 1 H), 3.32-3.70 (m, 4 H), 3.70-3.87 (m, 1 H), 4.41 (d,  $J$  = 3.6, 3.6 Hz, 0.5 H), 4.47 (dd,  $J$  = 3.6, 3.6 Hz, 0.5 H), 7.00-7.38 (m, 5 H);  $^{13}\text{C}$  NMR ( $\text{CDCl}_3$ , 75.5 MHz)  $\delta$  19.4 (t'), 19.7 (t'), 25.4 (t'), 30.6 (t'), 30.7 (t'), 36.48 (t'), 36.50 (t'), 38.9 (d'), 39.2 (d'), 39.5 (t'), 39.6 (t'), 60.7 (t'), 62.0 (t'), 62.4 (t'), 65.6 (t'), 98.6 (d'), 99.2 (d'), 126.2 (d'), 127.6 (d'), 128.4 (d'), 144.5 (s'); exact mass  $m/z$  calcd for  $\text{C}_{16}\text{H}_{24}\text{O}_3$  264.17255, found 264.17227.



A solution of **54** (2.60 g, 6.22 mmol) and LiBr (5.40 g, 6.23 mmol) in acetone was refluxed for 2 h, cooled and evaporated. The residue was diluted with water (40 mL), and extracted with Et<sub>2</sub>O (4 x 30 mL). The combined organic extracts were washed with brine (30 mL), dried, and evaporated. Flash chromatography of the residue over silica gel (2 x 35 cm), using 2:8 EtOAc-hexane, gave **55** (1.93 g, 95%) as a colorless oil that was a mixture of two diastereoisomers (<sup>1</sup>H NMR, 300 MHz): FTIR (CH<sub>2</sub>Cl<sub>2</sub> cast) unexceptional; <sup>1</sup>H NMR (CDCl<sub>3</sub>, 300 MHz)  $\delta$  1.40-1.62 (m, 4 H), 1.62-1.74 (m, 1 H), 1.74-2.06 (m, 3 H), 2.06-2.40 (m, 2 H), 2.89-3.05 (m, 1 H), 3.05-3.35 (m, 3 H), 3.35-3.50 (m, 1 H), 3.54-3.71 (m, 1 H), 3.71-3.87 (m, 1 H), 4.44 (dd, *J* = 3.5, 3.5 Hz, 0.5 H), 4.50 (dd, *J* = 3.5, 3.5 Hz, 0.5 H), 7.10-7.40 (m, 5 H); <sup>13</sup>C NMR (CDCl<sub>3</sub>, 75.5 MHz)  $\delta$  19.5 (t'), 19.7 (t'), 25.46 (t'), 25.48 (t'), 30.68 (t'), 30.74 (t'), 31.8 (t'), 36.25 (t'), 36.31 (t'), 39.67 (t'), 39.76 (t'), 41.0 (d'), 41.2 (d'), 62.1 (t'), 62.3 (t'), 65.42 (t'), 65.44 (t'), 98.7 (d'), 99.1 (d'), 126.6 (d'), 127.7 (d'), 128.6 (d'), 143.08 (s'), 143.13 (s'); exact mass *m/z* calcd for C<sub>16</sub>H<sub>23</sub><sup>81</sup>BrO<sub>2</sub> 328.08609, found 328.08641.

**Trimethyl[5-phenyl-7-[(tetrahydro-2H-pyran-2-yl)oxy]-1-heptynyl]silane (56).**

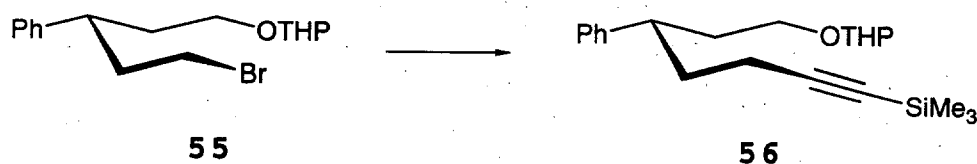

*n*-BuLi (2.5 M in hexane, 1.13 mL, 2.83 mmol) was added to a stirred and cooled (-78 °C) solution of trimethylsilylacetylene (0.43 mL, 2.83 mmol) in THF (10 mL). Stirring at -78 °C was continued for 1.5 h, and then **55** (0.396 g, 1.21 mmol) and HMPA (0.5 mL, 2.9 mmol) were added rapidly, each in one portion. The cold bath was removed and stirring was continued for 10 h. The mixture was quenched with water (5 mL) at -78 °C, and extracted with hexane (3 x 10 mL). The combined organic extracts were

washed with water (10 mL) and brine (10 mL), dried, and evaporated. Flash chromatography of the residue over silica gel (1 x 20 cm), using 1:10 EtOAc-hexane, gave **56** (0.377 g, 81%) as a colorless oil that was a mixture of two diastereoisomers ( $^1\text{H}$  NMR, 300 MHz): FTIR ( $\text{CH}_2\text{Cl}_2$  cast)  $2174\text{ cm}^{-1}$ ;  $^1\text{H}$  NMR ( $\text{CDCl}_3$ , 300 MHz)  $\delta$  0.17 (s, 9 H), 1.37-2.15 (m, 12 H), 2.76-2.94 (m, 1 H), 3.10-3.27 (m, 1 H), 3.34-3.48 (m, 1 H), 3.52-3.69 (m, 1 H), 3.69-3.85 (m, 1 H), 4.43 (dd,  $J = 3.4, 3.4\text{ Hz}$ , 0.5 H), 4.49 (dd,  $J = 3.4, 3.4\text{ Hz}$ , 0.5 H), 7.10-7.30 (m, 5 H);  $^{13}\text{C}$  NMR ( $\text{CDCl}_3$ , 75.5 MHz)  $\delta$  0.2 (q'), 18.0 (t'), 19.5 (t'), 19.6 (t'), 25.5 (t'), 30.69 (t'), 30.74 (t'), 35.65 (t'), 35.75 (t'), 36.3 (t'), 36.4 (t'), 41.5 (d'), 41.6 (d'), 62.0 (t'), 62.3 (t'), 65.6 (t'), 84.6 (s'), 98.5 (d'), 99.1 (d'), 107.2 (s'), 126.3 (d'), 127.7 (d'), 128.4 (d'), 143.9 (s'); exact mass  $m/z$  calcd for  $\text{C}_{21}\text{H}_{32}\text{O}_2\text{Si}$  344.21716, found 344.21734.

**2-[(3-Phenyl-6-heptynyl)oxy]tetrahydro-2H-pyran (**57**).**

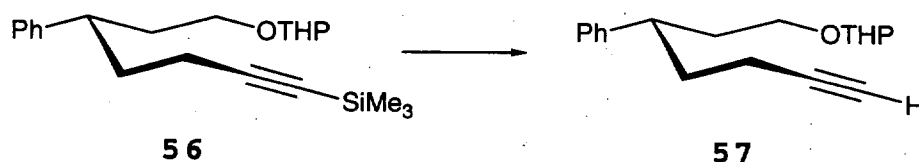

$\text{K}_2\text{CO}_3$  (0.154 g, 1.11 mmol) was added in one portion to a stirred and cooled ( $0\text{ }^\circ\text{C}$ ) solution of **56** (0.381 g, 1.11 mmol) in 2:1 MeOH-THF (15 mL), and stirring at  $0\text{ }^\circ\text{C}$  was continued for 6 h. The cold bath was removed, stirring was continued for 12 h, and the mixture was then filtered through a pad (1 x 2 cm) of Celite, using  $\text{Et}_2\text{O}$  (20 mL) as a rinse. Evaporation of the combined filtrates, and flash chromatography of the residue over silica gel (1.5 x 15 cm), using 1:10 EtOAc-hexane, gave **57** (0.284 g, 94%) as a colorless oil that was a mixture of two diastereoisomers ( $^1\text{H}$  NMR, 300 MHz): FTIR ( $\text{CH}_2\text{Cl}_2$  cast)  $3296, 2116\text{ cm}^{-1}$ ;  $^1\text{H}$  NMR ( $\text{CDCl}_3$ , 300 MHz)  $\delta$  1.45-2.16 (m, 13 H), 2.82-2.96 (m, 1 H), 3.18-3.32 (m, 1 H), 3.41-3.52 (m, 1 H), 3.60-3.74 (m, 1 H), 3.74-3.90 (m, 1 H), 4.47 (dd,  $J = 3.3, 3.3\text{ Hz}$ , 0.5 H), 4.53 (dd,  $J = 3.3, 3.3\text{ Hz}$ , 0.5 H), 7.12-7.41 (m, 5 H);  $^{13}\text{C}$  NMR ( $\text{CDCl}_3$ , 75.5 MHz)  $\delta$  16.46 (t'), 16.49

(t'), 19.5 (t'), 19.6 (t'), 25.4 (t'), 30.6 (t'), 30.7 (t'), 35.5 (t'), 35.6 (t'), 36.3 (t'), 36.4 (t'), 41.4 (d'), 41.6 (d'), 62.0 (t'), 62.2 (t'), 65.55 (t'), 65.59 (t'), 68.39 (d'), 68.42 (d'), 84.2 (s'), 98.6 (d'), 99.0 (d'), 126.3 (d'), 127.7 (d'), 128.4 (d'), 143.8 (s'), 143.9 (s'); exact mass  $m/z$  calcd for  $C_{18}H_{24}O_2$  272.17764, found 272.17726.

**Trimethyl[6-phenyl-8-[(tetrahydro-2H-pyran-2-yl)oxy]-2-octynyl]silane (58).**

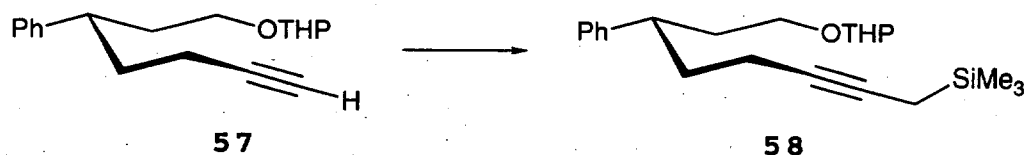

*n*-BuLi (2.5 M in hexane, 1.20 mL, 3.00 mmol) was added to a stirred and cooled (-78 °C) solution of **57** (0.652 g, 2.40 mmol) in THF (15 mL). Stirring at -78 °C was continued for 1.5 h, and then  $Me_3SiCH_2OSO_2CF_3$  (0.60 mL, 3.00 mmol) and HMPA (0.5 mL) were added rapidly, each in one portion. The cold bath was removed and stirring was continued for 10 h. The mixture was poured into water (25 mL) and extracted with  $CH_2Cl_2$  (3 x 25 mL). The combined organic extracts were dried and evaporated. Flash chromatography of the residue over silica gel (1.5 x 20 cm), using 1:10 EtOAc-hexane, gave **58** (0.791 g, 92%) as a colorless oil that was a mixture of two diastereoisomers ( $^1H$  NMR, 300 MHz): FTIR ( $CH_2Cl_2$  cast) unexceptional;  $^1H$  NMR ( $CDCl_3$ , 300 MHz)  $\delta$  0.10 (s, 9 H), 1.38-2.11 (m, 14 H), 2.76-2.94 (m, 1 H), 3.11-3.26 (m, 1 H), 3.35-3.48 (m, 1 H), 3.53-3.69 (m, 1 H), 3.70-3.86 (m, 1 H), 4.43 (dd,  $J$  = 3.4, 3.4 Hz, 0.5 H), 4.49 (dd,  $J$  = 3.4, 3.4 Hz, 0.5 H), 7.03-7.37 (m, 5 H);  $^{13}C$  NMR ( $CDCl_3$ , 75.5 MHz)  $\delta$  -2.0 (q'), 7.0 (t'), 17.1 (t'), 19.5 (t'), 19.7 (t'), 25.5 (t'), 30.7 (t'), 30.8 (t'), 36.3 (t'), 36.4 (t'), 36.7 (t'), 36.8 (t'), 41.5 (d'), 41.7 (d'), 62.0 (t'), 62.3 (t'), 65.8 (t'), 77.5 (t'), 77.6 (s'), 78.4 (s'), 78.5 (s'), 98.6 (d'), 99.1 (d'), 126.2 (d'), 127.2 (d'), 128.4 (d'), 144.3 (s'), 144.4 (s'); exact mass  $m/z$  calcd for  $C_{22}H_{34}O_2Si$  358.23282, found 358.23321.



**3-Phenyl-8-(trimethylsilyl)-6-octyn-1-ol (59).**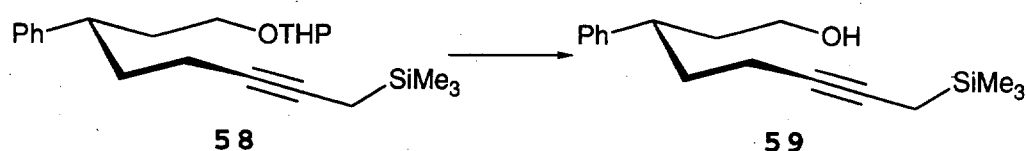

TsOH.H<sub>2</sub>O (30.0 mg, 0.158 mmol) was added to a stirred solution of **58** (0.685 g, 1.91 mmol) in 3:1 MeOH-H<sub>2</sub>O (150 mL), and the mixture was refluxed for 4 h, cooled, and concentrated. The resulting aqueous mixture was extracted with Et<sub>2</sub>O (3 x 20 mL), and the combined organic extracts were washed with saturated aqueous NaHCO<sub>3</sub> (20 mL), water (20 mL), and brine (20 mL), dried, and evaporated. Flash chromatography of the residue over silica gel (2 x 15 cm), using 2:8 EtOAc-hexane, gave **59** (0.469 g, 89%) as a pure (<sup>1</sup>H NMR, 300 MHz), colorless oil: FTIR (CH<sub>2</sub>Cl<sub>2</sub> cast) 3332 cm<sup>-1</sup>; <sup>1</sup>H NMR (CDCl<sub>3</sub>, 300 MHz) δ 0.10 (s, 9 H), 1.16 (t, *J* = 5.0 Hz, 1 H), 1.43 (t, *J* = 2.3 Hz, 2 H), 1.65-2.12 (m, 6 H), 2.87 (dddd, *J* = 4.7, 4.7, 4.7, 4.7 Hz, 1 H), 3.40-3.60 (m, 2 H), 7.12-7.34 (m, 5 H); <sup>13</sup>C NMR (CDCl<sub>3</sub>, 75.5 MHz) δ -2.0 (q'), 7.0 (t'), 17.0 (t'), 36.6 (t'), 39.3 (t'), 41.4 (d'), 61.2 (t'), 77.8 (s'), 78.3 (s'), 126.4 (d'), 127.7 (d'), 128.5 (d'), 144.2 (s'); exact mass *m/z* calcd for C<sub>17</sub>H<sub>26</sub>OSi 274.17529, found 274.17522.

**3-Phenyl-8-(trimethylsilyl)-6-octynal (29).**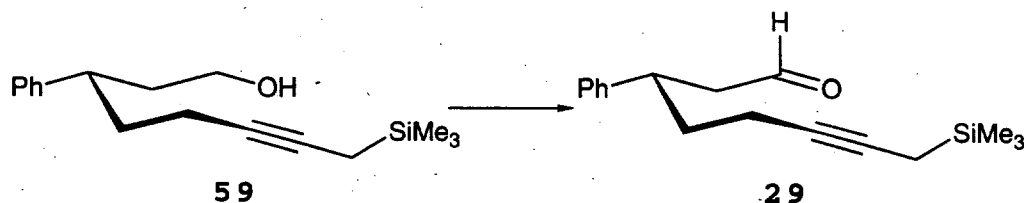

DMSO (0.19 mL, 2.67 mmol) was added to a stirred and cooled (-78 °C) solution of (COCl)<sub>2</sub> (0.19 mL, 2.18 mmol) in CH<sub>2</sub>Cl<sub>2</sub> (25 mL). Stirring at -78 °C was continued for 20 min, and then a solution of **59** (0.147 g, 0.536 mmol) in CH<sub>2</sub>Cl<sub>2</sub> (2 mL) was added by

syringe over 1 min. Stirring was continued for 30 min at  $-78\text{ }^{\circ}\text{C}$ , and then  $\text{Et}_3\text{N}$  (0.76 mL, 5.45 mmol) was added. The cold bath was removed, and the mixture was stirred for 3 h, diluted with water (1 mL) and  $\text{CH}_2\text{Cl}_2$  (10 mL), and transferred to a separatory funnel. The organic phase was washed with brine (10 mL), dried, and evaporated. Flash chromatography of the residue over silica gel (2 x 15 cm), using (1:10 EtOAc-hexane, gave **29** (0.132 g, 90%) as a pure ( $^1\text{H}$  NMR, 300 MHz), colorless oil: FTIR ( $\text{CH}_2\text{Cl}_2$  cast)  $1725\text{ cm}^{-1}$ ;  $^1\text{H}$  NMR ( $\text{CDCl}_3$ , 300 MHz)  $\delta$  0.12 (s, 9 H), 1.43 (t,  $J = 2.4\text{ Hz}$ , 2 H), 1.67–2.15 (m, 4 H), 2.63–2.81 (m, 2 H), 3.30–3.43 (m, 1 H), 7.15–7.37 (m, 5 H), 9.66 (t,  $J = 1.8\text{ Hz}$ , 1 H);  $^{13}\text{C}$  NMR ( $\text{CDCl}_3$ , 75.5 MHz)  $\delta$  -2.0 (q'), 7.0 (t'), 16.9 (t'), 36.2 (t'), 39.0 (d'), 50.1 (t'), 77.7 (s'), 78.4 (s'), 126.8 (d'), 127.6 (d'), 128.8 (d'), 143.0 (s'), 201.7 (d'); exact mass  $m/z$  calcd for  $\text{C}_{17}\text{H}_{24}\text{OSi}$  272.15964, found 272.15907.

**Derivatization of 28a: Trans-2-Ethenylidene-5-phenyl-1-cyclohexyl Acetate.**

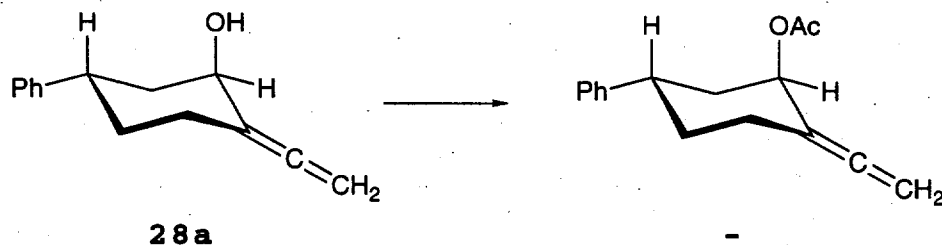

$\text{Ac}_2\text{O}$  (0.014 mL, 0.15 mmol),  $\text{Et}_3\text{N}$  (0.025 mL, 0.18 mmol), and DMAP (0.5 mg, 0.004 mmol) were added to a stirred solution of **28a** (8.0 mg, 0.040 mmol) in  $\text{CH}_2\text{Cl}_2$  (3 mL). Stirring was continued for 1 h and the mixture was then filtered through a pad (1.5 x 1 cm) of flash chromatography silica gel, using  $\text{CH}_2\text{Cl}_2$  (20 mL) as a rinse. Evaporation of the combined filtrates, and flash chromatography of the residue over silica gel (1 x 10 cm), using 1:10 EtOAc-hexane, gave the derived acetate (8.5 mg, 88%) as a pure ( $^1\text{H}$  NMR, 300 MHz), colorless oil: FTIR ( $\text{CH}_2\text{Cl}_2$  cast) 1962, 1738,  $1234\text{ cm}^{-1}$ ;  $^1\text{H}$  NMR ( $\text{CDCl}_3$ , 300 MHz)  $\delta$  1.66 (dddd,  $J = 13.0$ ,

13.0, 13.0, 4.1 Hz, 1 H), 1.84 (ddd,  $J = 13.6, 13.0, 2.8$  Hz, 1 H), 1.95–2.08 (m, 1 H), 2.08–2.23 [m, including singlet at  $\delta$  2.12 (3 H), 4 H], 2.34 (ddd,  $J = 13.0, 3.4, 3.4$  Hz, 1 H), 2.47 (ddd,  $J = 13.6, 4.1, 4.1$  Hz, 1 H), 3.02 (dddd,  $J = 13.0, 13.0, 3.4, 3.4$  Hz, 1 H), 4.75 (d,  $J = 4.1$  Hz, 2 H), 5.57 (dd,  $J = 2.8, 2.8$  Hz, 1 H), 7.16–7.38 (m, 5 H);  $^{13}\text{C}$  NMR ( $\text{CDCl}_3$ , 75.5 MHz)  $\delta$  21.5 (q'), 27.0 (t'), 33.9 (t'), 37.9 (d'), 38.6 (t'), 72.2 (d'), 74.8 (t'), 98.6 (s'), 126.4 (d'), 126.9 (d'), 128.6 (d'), 147.8 (s'), 170.1 (s'), 205.1 (s'); exact mass  $m/z$  calcd for  $\text{C}_{16}\text{H}_{18}\text{O}_2$  242.13068, found 242.13060.

**4-Phenyl-9-(trimethylsilyl)-7-nonyn-2-ol (60).**

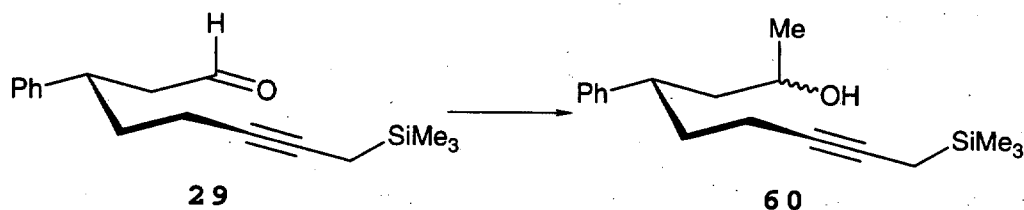

A solution of **29** (46.6 mg, 0.171 mmol) in  $\text{Et}_2\text{O}$  (3 mL) was added dropwise to a stirred and cooled ( $0^\circ\text{C}$ ) solution of  $\text{MeMgBr}$  (0.36 mmol) in  $\text{Et}_2\text{O}$  (15 mL). The cold bath was removed and stirring was continued for 2 h. The mixture was quenched with saturated aqueous  $\text{NH}_4\text{Cl}$  solution (5 mL) at  $0^\circ\text{C}$  and extracted with  $\text{Et}_2\text{O}$  (3 x 25 mL). The combined organic extracts were washed with brine (10 mL), dried, and evaporated. Flash chromatography of the residue over silica gel (1.5 x 15 cm), using 2:8  $\text{EtOAc}$ -hexane, gave **60** (44.6 mg, 90%) as a pure ( $^1\text{H}$  NMR, 400 MHz), colorless oil, which was a 1:1 mixture of diastereoisomers ( $^1\text{H}$  NMR, 400 MHz): FTIR ( $\text{CH}_2\text{Cl}_2$  cast)  $3347\text{ cm}^{-1}$ ;  $^1\text{H}$  NMR ( $\text{CDCl}_3$ , 400 MHz)  $\delta$  0.10 (s, 9 H), 1.12 (d,  $J = 5.9$  Hz, 3 H), 1.39 (br s, 1 H), 1.43 (t,  $J = 2.5$  Hz, 2 H), 1.64–2.08 (m, 6 H), 2.97 (dddd,  $J = 4.9, 4.9, 4.9, 4.9$  Hz, 1 H), 3.43–3.56 (m, 1 H), 7.15–7.33 (m, 5 H);  $^{13}\text{C}$  NMR ( $\text{CDCl}_3$ , 75.5 MHz)  $\delta$  -2.0 (q'), 7.0 (t'), 16.9 (t'), 17.1 (t'), 23.2 (q'), 24.3 (q'), 36.7 (t'), 37.0 (t'), 41.4 (d'), 42.0 (d'), 46.0 (t'), 46.1 (t'), 65.7 (d'), 66.6 (d'), 77.7 (s'), 77.8 (s'), 78.3 (s'),

78.4' (s'), 126.3 (d'), 126.4 (d'), 127.6 (d'), 127.8 (d'), 128.5 (d'), 128.6 (d'), 144.3 (s'), 144.4 (s'); exact mass  $m/z$  calcd for  $C_{18}H_{28}OSi$  288.19095, found 288.19067.

**4-Phenyl-9-(trimethylsilyl)-7-nonyn-2-one (30).**

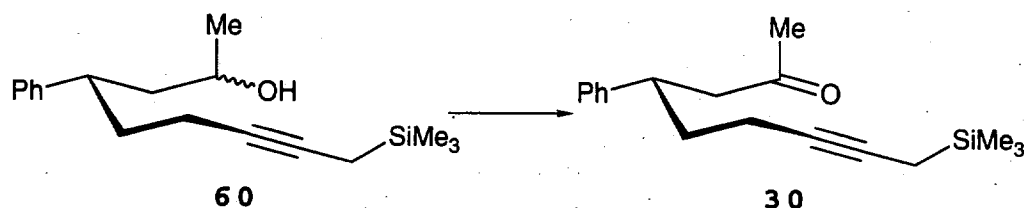

A solution of alcohols **60** (0.140 g, 0.486 mmol) in  $CH_2Cl_2$  (4 mL) was added to a stirred mixture of PCC (1.63 g, 7.56 mmol) and powdered molecular sieves (3Å, 3.1 g) in  $CH_2Cl_2$  (20 mL). The mixture was stirred for 25 min, diluted with  $Et_2O$  (20 mL), and filtered through a pad (2 x 2 cm) of flash chromatography silica gel, using  $Et_2O$  (30 mL) as a rinse. Evaporation of the combined filtrates, and flash chromatography of the residue over silica gel (1 x 15 cm), using 1:10  $EtOAc$ -hexane, gave **30** (0.126 g, 90%) as a pure ( $^1H$  NMR, 300 MHz), colorless oil: FTIR ( $CH_2Cl_2$  cast)  $1717\text{ cm}^{-1}$ ;  $^1H$  NMR ( $CDCl_3$ , 300 MHz)  $\delta$  0.10 (s, 9 H), 1.42 (t,  $J = 2.4\text{ Hz}$ , 2 H), 1.61-2.10 [m, including singlet at  $\delta$  2.01 (3 H), 7 H], 2.71 (dd,  $J = 16.5, 7.6\text{ Hz}$ , 1 H), 2.76 (dd,  $J = 16.5, 7.6\text{ Hz}$ , 1 H), 3.22-3.35 (m, 1 H), 7.10-7.33 (m, 5 H);  $^{13}C$  NMR ( $CDCl_3$ , 75.5 MHz)  $\delta$  -2.0 (q'), 7.0 (t'), 17.0 (t'), 30.4 (d'), 36.1 (t'), 40.3 (d'), 50.5 (t'), 77.9 (s'), 78.0 (s'), 126.6 (d'), 127.6 (d'), 128.5 (d'), 143.5 (s'), 207.5 (s'); exact mass  $m/z$  calcd for  $C_{18}H_{26}OSi$  286.17529, found 286.17498.

**(8,8-Dimethoxy-6-phenyl-2-octynyl)trimethylsilane (31).**

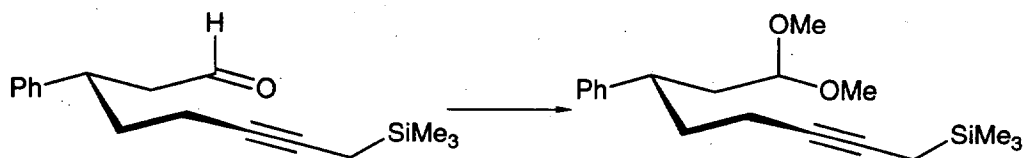

29

31

$\text{YbCl}_3 \cdot 6\text{H}_2\text{O}$  (0.560 g, 1.45 mmol) and  $\text{CH}(\text{OMe})_3$  (2.62 mL, 23.9 mmol) were added to a stirred solution of **29** (0.178 g, 0.654 mmol) in MeOH (1.5 mL). Stirring was continued for 10 h, and the mixture was diluted with  $\text{Et}_2\text{O}$  (5 mL) and filtered through a pad (2 x 2 cm) of flash chromatography silica gel, using  $\text{Et}_2\text{O}$  (20 mL) as a rinse. Evaporation of the combined filtrates, and flash chromatography of the residue over silica gel (1.5 x 15 cm), using 1:10 EtOAc-hexane, gave **31** (0.160 g, 77%) as a pure ( $^1\text{H}$  NMR, 300 MHz), colorless oil: FTIR ( $\text{CH}_2\text{Cl}_2$  cast) unexceptional;  $^1\text{H}$  NMR ( $\text{CDCl}_3$ , 300 MHz)  $\delta$  0.12 (s, 9 H), 1.42 (t,  $J$  = 2.5 Hz, 2 H), 1.64–2.09 (m, 6 H), 2.86 (dddd,  $J$  = 4.9, 4.9, 4.9, 4.9 Hz, 1 H), 3.22 (s, 3 H), 3.27 (s, 3 H), 4.07 (dd,  $J$  = 7.6, 3.7 Hz, 1 H), 7.13–7.36 (m, 5 H);  $^{13}\text{C}$  NMR ( $\text{CDCl}_3$ , 75.5 MHz)  $\delta$  -2.0 (q'), 7.0 (t'), 17.0 (t'), 36.6 (t'), 39.3 (t'), 40.6 (d'), 52.6 (q'), 52.7 (q'), 77.7 (s'), 78.3 (s'), 102.8 (d'), 126.3 (d'), 127.7 (d'), 128.5 (d'), 144.1 (s'); exact mass  $m/z$  calcd for  $\text{C}_{19}\text{H}_{30}\text{O}_2\text{Si}$  318.20151, found 318.20148.

**3-Phenyl-5-[(tetrahydro-2H-pyran-2-yl)oxy]pentanal (61).**

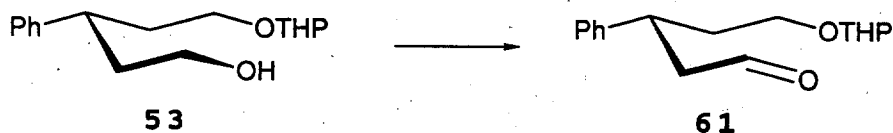

A solution of **53** (0.154 g, 0.583 mmol) in  $\text{CH}_2\text{Cl}_2$  (4 mL) was added to a stirred mixture of PCC (1.32 g, 6.12 mmol) and powdered molecular sieves (3Å, 1.90 g) in  $\text{CH}_2\text{Cl}_2$  (25 mL). The mixture was stirred for 35 min, diluted with  $\text{Et}_2\text{O}$  (20 mL), and filtered through a pad (2 x 2 cm) of flash chromatography silica gel, using  $\text{Et}_2\text{O}$  (30 mL) as a rinse. Evaporation of the combined filtrates, and flash chromatography of the residue over silica gel (1 x 15 cm), using 1:10 EtOAc-hexane, gave **61** (0.125 g, 82%) as a colorless oil that was a mixture of two diastereoisomers ( $^1\text{H}$  NMR, 300 MHz): FTIR

(CH<sub>2</sub>Cl<sub>2</sub> cast) 2723, 1724 cm<sup>-1</sup>; <sup>1</sup>H NMR (CDCl<sub>3</sub>, 300 MHz) δ 1.42-2.07 (m, 8 H), 2.75 (dd, *J* = 7.4, 1.9 Hz, 2 H), 3.11-3.22 (m, 1 H), 3.32-3.53 (m, 2 H), 3.55-3.86 (m, 2 H), 4.43 (dd, *J* = 3.6, 3.6 Hz, 0.5 H), 4.49 (dd, *J* = 3.6, 3.6 Hz, 0.5 H), 7.10-7.30 (m, 5 H), 9.66 (t, *J* = 1.9 Hz, 1 H); <sup>13</sup>C NMR (CDCl<sub>3</sub>, 75.5 MHz) δ 19.4 (t'), 19.6 (t'), 25.3 (t'), 30.56 (t'), 30.63 (t'), 36.2 (t'), 36.3 (t'), 36.8 (d'), 36.9 (d'), 50.2 (t'), 50.3 (t'), 62.0 (t'), 62.3 (t'), 64.9 (t'), 65.0 (t'), 98.5 (d'), 99.1 (d'), 126.6 (d'), 127.4 (d'), 128.6 (d'), 143.16 (s'), 143.22 (s'), 201.5 (d'), 201.6 (d'); exact mass *m/z* calcd for C<sub>16</sub>H<sub>22</sub>O<sub>3</sub> 262.15689, found 262.15621.

2-[(6,6-Dibromo-3-phenyl-5-hexenyl)oxy]tetrahydro-2H-pyran (62).

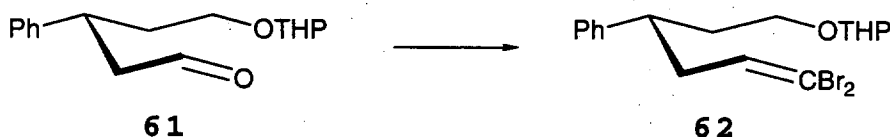

A solution of  $\text{CBr}_4$  (2.78 g, 8.40 mmol) in  $\text{CH}_2\text{Cl}_2$  (75 mL) was added at a fast dropwise rate to a stirred and cooled ( $-20\text{ }^\circ\text{C}$ ) solution of  $\text{Ph}_3\text{P}$  (2.20 g, 8.40 mmol) in  $\text{CH}_2\text{Cl}_2$  (75 mL). Stirring at  $-20\text{ }^\circ\text{C}$  was continued for 15 min, and then a solution of **61** (1.10 g, 4.20 mmol) and  $\text{Et}_3\text{N}$  (0.59 mL, 4.20 mmol) in  $\text{CH}_2\text{Cl}_2$  (40 mL) was added dropwise at  $-60\text{ }^\circ\text{C}$ . The cold bath was removed, stirring was continued for 30 min, and the mixture was filtered through a pad (2 x 3 cm) of flash chromatography silica gel, using  $\text{Et}_2\text{O}$  (50 mL) as a rinse. Evaporation of the combined filtrates, and flash chromatography of the residue over silica gel (1.5 x 25 cm), using 1:20  $\text{EtOAc}$ -hexane, gave **62** (1.34 g, 76%) as a colorless oil that was a mixture of two diastereoisomers ( $^1\text{H}$  NMR, 300 MHz): FTIR ( $\text{CH}_2\text{Cl}_2$  cast) unexceptional;  $^1\text{H}$  NMR ( $\text{CDCl}_3$ , 300 MHz)  $\delta$  1.42-2.10 (m, 8 H), 2.30-2.57 (m, 2 H), 2.82-2.97 (m, 1 H), 3.11-3.31 (m, 1 H), 3.36-3.50 (m, 1 H), 3.53-3.86 (m, 2 H), 4.42 (dd,  $J = 3.2, 3.2$  Hz, 0.5 H), 4.49 (dd,  $J = 3.2, 32.2$  Hz, 0.5 H), 6.26 (t,  $J = 7.1$  Hz, 1 H), 7.10-7.36 (m, 5 H);  $^{13}\text{C}$  NMR ( $\text{CDCl}_3$ , 75.5 MHz)  $\delta$  19.5

(t'), 19.7 (t'), 25.4 (t'), 30.66 (t'), 30.71 (t'), 35.7 (t'), 35.8 (t'), 40.05 (t'), 40.14 (t'), 41.3 (d'), 41.5 (d'), 62.1 (t'), 62.4 (t'), 65.30 (t'), 65.34 (t'), 89.4 (s'), 89.5 (s'), 98.7 (d'), 99.1 (d'), 126.6 (d'), 126.7 (d'), 127.5 (d'), 128.5 (d'), 128.6 (d'), 136.88 (d'), 136.93 (d'), 143.4 (s'), 143.5 (s'); exact mass  $m/z$  calcd for  $C_{17}H_{22}^{81}Br_2O_2$  419.99457, found 419.99404.

**2-[(3-Phenyl-5-hexynyl)oxy]tetrahydro-2H-pyran (63).**

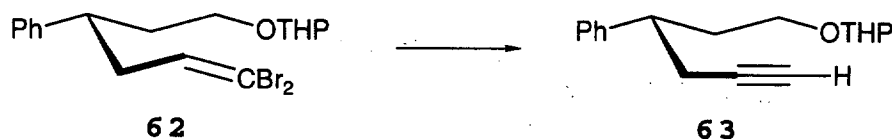

$n$ -BuLi (2.5 M in hexane, 0.88 mL, 2.20 mmol) was added dropwise to a stirred and cooled ( $-78\text{ }^{\circ}\text{C}$ ) solution of **62** (0.440 g, 1.05 mmol) in THF (30 mL). Stirring at  $-78\text{ }^{\circ}\text{C}$  was continued for 2 h, and then water (1.0 mL) was added. The cold bath was removed, stirring was continued for 30 min, and the mixture was diluted with  $\text{Et}_2\text{O}$  (20 mL) and washed with brine (20 mL). The organic extract was dried and evaporated. Flash chromatography of the residue over silica gel (1.5 x 15 cm), using 1:20  $\text{EtOAc}$ -hexane, gave **63** (0.255 g, 94%) as a colorless oil that was a mixture of two diastereoisomers ( $^1\text{H}$  NMR, 300 MHz): FTIR ( $\text{CH}_2\text{Cl}_2$  cast) 3290, 2117  $\text{cm}^{-1}$ ;  $^1\text{H}$  NMR ( $\text{CDCl}_3$ , 300 MHz)  $\delta$  1.40–2.03 (m, 8 H), 2.14–2.27 (m, 1 H), 2.46–2.56 (m, 2 H), 2.92–3.08 (m, 1 H), 3.16–3.34 (m, 1 H), 3.35–3.48 (m, 1 H), 3.57–3.86 (m, 2 H), 4.44 (dd,  $J = 3.3, 3.3$  Hz, 0.5 H), 4.53 (dd,  $J = 3.3, 3.3$  Hz, 0.5 H), 7.13–7.38 (m, 5 H);  $^{13}\text{C}$  NMR ( $\text{CDCl}_3$ , 75.5 MHz)  $\delta$  19.4 (t'), 19.6 (t'), 25.4 (t'), 26.1 (t'), 26.3 (t'), 30.6 (t'), 30.6 (t'), 34.7 (t'), 34.8 (t'), 41.2 (d'), 41.4 (d'), 61.8 (t'), 62.2 (t'), 65.2 (t'), 65.3 (t'), 69.8 (d'), 82.6 (s'), 98.4 (d'), 98.9 (d'), 126.5 (d'), 127.5 (d'), 128.3 (d'), 128.4 (d'), 143.5 (s'); exact mass  $m/z$  calcd for  $C_{17}H_{22}O_2$  258.16199, found 258.16187.

**Trimethyl[5-phenyl-7-[(tetrahydro-2H-pyran-2-yl)oxy]-**





TsOH.H<sub>2</sub>O (12.0 mg, 0.063 mmol) was added to a stirred solution of **64** (0.292 g, 0.848 mmol) in 3:1 MeOH-H<sub>2</sub>O (80 mL), and the mixture was refluxed for 3.5 h, cooled, and concentrated. The resulting aqueous mixture was extracted with Et<sub>2</sub>O (3 x 20 mL). The combined organic extracts were washed with saturated aqueous NaHCO<sub>3</sub> (20 mL), water (20 mL) and brine (20 mL), dried, and evaporated. Flash chromatography of the residue over silica gel (1.5 x 15 cm), using 2:8 EtOAc-hexane, gave **65** (0.216 g, 98%) as a pure (<sup>1</sup>H NMR, 300 MHz), colorless oil: FTIR (CH<sub>2</sub>Cl<sub>2</sub> cast) 3332 cm<sup>-1</sup>; <sup>1</sup>H NMR (CDCl<sub>3</sub>, 300 MHz) δ 0.04 (s, 9 H), 1.38 (t, *J* = 2.6 Hz, 2 H), 1.47 (br s, 1 H), 1.79-1.93 (m, 1 H), 2.05-2.19 (m, 1 H), 2.38-2.57 (m, 2 H), 2.83-2.96 (m, 1 H), 3.44-3.64 (m, 2 H), 7.13-7.35 (m, 5 H); <sup>13</sup>C NMR (CDCl<sub>3</sub>, 75.5 MHz) δ -2.1 (q'), 7.0 (t'), 26.7 (t'), 38.1 (t'), 42.1 (d'), 61.1 (t'), 76.8 (s'), 79.1 (s'), 126.5 (d'), 127.5 (d'), 128.4 (d'), 144.2 (s'); exact mass *m/z* calcd for C<sub>16</sub>H<sub>24</sub>OSi 260.15964, found 260.15939.

**3-Phenyl-7-(trimethylsilyl)-5-heptynal (32).**

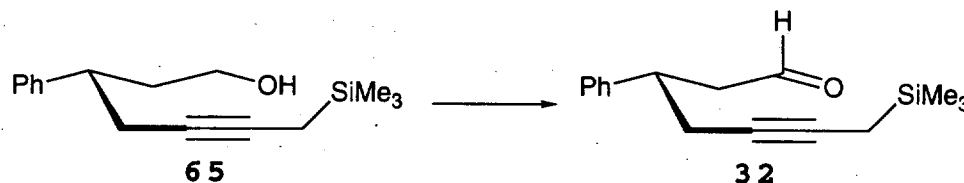

A solution of **65** (0.165 g, 0.635 mmol) in CH<sub>2</sub>Cl<sub>2</sub> (5 mL) was added to a stirred mixture of PCC (1.43 g, 6.63 mmol) and powdered molecular sieves (3Å, 2.20 g) in CH<sub>2</sub>Cl<sub>2</sub> (30 mL). The mixture was stirred for 30 min, diluted with Et<sub>2</sub>O (20 mL), and filtered through a pad (2 x 2 cm) of flash chromatography silica gel, using Et<sub>2</sub>O (30 mL) as a rinse. Evaporation of the combined filtrates, and flash chromatography of the residue over silica gel (1 x 15 cm), using 1:10 EtOAc-hexane, gave **32** (0.148 g, 90%) as a pure (<sup>1</sup>H NMR, 300 MHz), colorless oil: FTIR (CH<sub>2</sub>Cl<sub>2</sub> cast) 2722, 2220, 1724 cm<sup>-1</sup>; <sup>1</sup>H NMR (CDCl<sub>3</sub>, 300 MHz) δ 0.06 (s, 9 H), 1.42 (t, *J* = 2.7 Hz, 2 H), 2.47 (ddt, *J* = 16.6, 6.0, 2.7 Hz, 1 H), 2.56 (ddt, *J* = 16.6, 5.8, 2.7 Hz, 1 H), 2.77 (ddd, *J* = 17.2, 8.2, 1.8 Hz, 1 H), 3.02 (ddd, *J*

= 17.2, 6.2, 1.8 Hz, 1 H), 3.39 (br dddd,  $J$  = 8.2, 6.2, 6.0, 5.8 Hz, 1 H), 7.16–7.37 (m, 5 H), 9.72 (t,  $J$  = 1.8 Hz, 1 H);  $^{13}\text{C}$  NMR ( $\text{CDCl}_3$ , 75.5 MHz)  $\delta$  -2.0 (q'), 7.0 (t'), 26.6 (t'), 39.6 (d'), 48.8 (t'), 75.9 (s'), 80.3 (s'), 126.9 (d'), 127.3 (d'), 128.6 (d'), 143.1 (s'), 201.5 (d'); exact mass  $m/z$  calcd for  $\text{C}_{16}\text{H}_{21}\text{OSi}$  ( $M - \text{H}$ ) 257.13617, found 257.13608.

**1-(1-Chloroethenyl)-4-phenylcyclopentene (32b).**

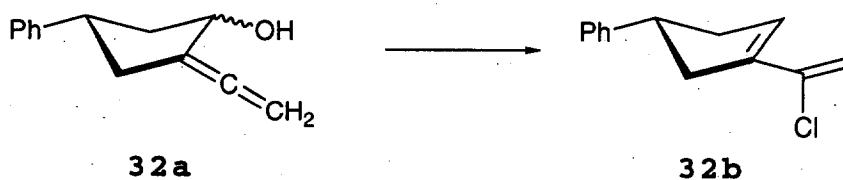

A solution of alcohols **32a** (15.0 mg, 0.081 mmol) in  $\text{CH}_2\text{Cl}_2$  (2.0 mL) was added to a stirred suspension of  $\text{ZnCl}_2$  (12.0 mg, 0.088 mmol) in  $\text{CH}_2\text{Cl}_2$  (20 mL). Stirring was continued for 24 h, and the resulting solution was filtered through a pad (2 x 2 cm) of flash chromatography silica gel, using  $\text{Et}_2\text{O}$  (30 mL) as a rinse. Evaporation of the solvent, and flash chromatography of the residue over silica gel (1.5 x 10 cm), using hexane, gave **32b** (7.5 mg, 45%) as a pure ( $^1\text{H}$  NMR, 360 MHz), colorless oil, identified by its  $^1\text{H}$  NMR spectrum.

**(7,7-Dimethoxy-5-phenyl-2-heptynyl)trimethylsilane (33).**

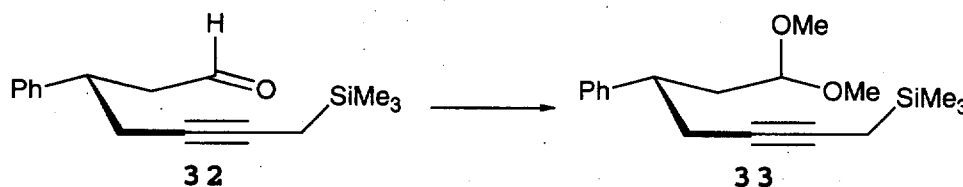

$\text{YbCl}_3 \cdot 6\text{H}_2\text{O}$  (0.30 g, 0.77 mmol) and  $\text{CH}(\text{OMe})_3$  (1.60 mL, 14.6 mmol) was added to a stirred solution of **32** (0.102 g, 0.395 mmol) in MeOH (1 mL). Stirring was continued for 10 h, and the mixture was diluted with  $\text{Et}_2\text{O}$  (5 mL) and filtered through a pad (2 x 2 cm) of flash chromatography silica gel, using  $\text{Et}_2\text{O}$  (20 mL) as a rinse.

Evaporation of the combined filtrates, and flash chromatography of the residue over silica gel (1.5 x 15 cm), using 1:20 EtOAc-hexane, gave **33** (0.103 g, 86%) as a pure ( $^1\text{H}$  NMR, 300 MHz), colorless oil: FTIR ( $\text{CH}_2\text{Cl}_2$  cast) unexceptional;  $^1\text{H}$  NMR ( $\text{CDCl}_3$ , 300 MHz)  $\delta$  0.03 (s, 9 H), 1.38 (t,  $J = 2.6$  Hz, 2 H), 1.85 (ddd,  $J = 14.3, 9.8, 3.8$  Hz, 1 H), 2.22 (ddd,  $J = 14.3, 7.8, 4.8$  Hz, 1 H), 2.37-2.55 (m, 2 H), 2.82-2.94 (m, 1 H), 3.22 (s, 3 H), 3.28 (s, 3 H), 4.15 (dd,  $J = 7.8, 3.8$  Hz, 1 H), 7.15-7.34 (m, 5 H);  $^{13}\text{C}$  NMR ( $\text{CDCl}_3$ , 75.5 MHz)  $\delta$  -2.1 (q'), 7.0 (t'), 26.7 (t'), 37.7 (t'), 41.2 (d'), 52.4 (q'), 52.5 (q'), 76.6 (s'), 79.1 (s'), 102.6 (d'), 126.5 (d'), 127.5 (d'), 128.4 (d'), 144.1 (s'); exact mass  $m/z$  calcd for  $\text{C}_{17}\text{H}_{25}\text{O}_2\text{Si}$  (M -  $\text{CH}_3$ ) 289.16238, found 289.16295.

**4-Phenyl-8-(trimethylsilyl)-6-octyn-2-ol (**66**).**

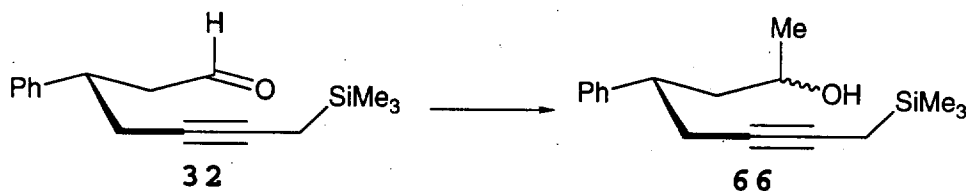

A solution of **32** (120 mg, 0.465 mmol) in  $\text{Et}_2\text{O}$  (5 mL) was added dropwise to a stirred and cooled (0 °C) solution of commercial  $\text{MeMgBr}$  (3.0 M in  $\text{Et}_2\text{O}$ , 0.31 mL, 0.93 mmol) in  $\text{Et}_2\text{O}$  (35 mL). The cold bath was removed, and stirring was continued for 2 h. The mixture was then recooled to 0 °C, quenched with saturated aqueous  $\text{NH}_4\text{Cl}$  (15 mL), and extracted with  $\text{Et}_2\text{O}$  (3 x 25 mL). The combined organic extracts were washed with brine (20 mL), dried, and evaporated. Flash chromatography of the residue over silica gel (1.5 x 15 cm), using 2:8 EtOAc-hexane, gave **66** (115 mg, 90%) as a colorless oil that was a 1:1 mixture of two diastereoisomers ( $^1\text{H}$  NMR, 300 MHz): FTIR ( $\text{CH}_2\text{Cl}_2$  cast) 3356  $\text{cm}^{-1}$ ;  $^1\text{H}$  NMR ( $\text{CDCl}_3$ , 300 MHz)  $\delta$  0.04 (s, 9 H), 1.12 (d,  $J = 6.1$  Hz, 1.5 H), 1.17 (d,  $J = 6.1$  Hz, 1.5 H), 1.39 (dd,  $J = 2.6, 2.6$  Hz, 1 H), 1.40 (dd,  $J = 2.6, 2.6$  Hz, 1 H), 1.60-2.04 (m, 3 H), 2.33-2.56 (m, 2 H), 2.78-2.92 (m, 0.5 H), 2.94-3.08 (m, 0.5 H), 3.45-3.60 (m, 0.5 H), 3.67-3.82 (m, 0.5 H), 7.14-7.36 (m, 5 H);  $^{13}\text{C}$  NMR ( $\text{CDCl}_3$ , 75.5 MHz)  $\delta$

-2.1 (q'), 7.0 (t'), 23.4 (q'), 24.4 (q'), 26.7 (t'), 27.2 (t'), 42.0 (d'), 42.5 (d'), 44.7 (t'), 44.7 (t'), 65.6 (d'), 66.4 (d'), 76.8 (s'), 76.9 (s'), 79.0 (s'), 79.2 (s'), 126.4 (d'), 126.5 (d'), 127.4 (d'), 127.6 (d'), 128.4 (d'), 128.5 (d'), 144.3 (s'), 144.6 (s'); exact mass  $m/z$  calcd for  $C_{17}H_{26}OSi$  274.17529, found 274.17552.

**4-Phenyl-8-(trimethylsilyl)-6-octyn-2-one (34).**

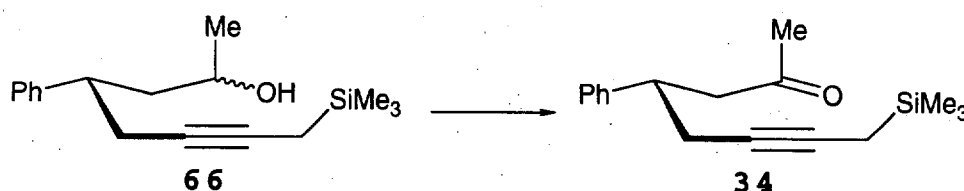

A solution of alcohols **66** (71.6 mg, 0.261 mmol) in CH<sub>2</sub>Cl<sub>2</sub> (2 mL) was added to a stirred mixture of PCC (0.880 g, 4.08 mmol) and powdered molecular sieves (3Å, 1.76 g) in CH<sub>2</sub>Cl<sub>2</sub> (18 mL). The mixture was stirred for 30 min, diluted with Et<sub>2</sub>O (10 mL), and filtered through a pad (2 x 1.5 cm) of flash chromatography silica gel, using Et<sub>2</sub>O (20 mL) as a rinse. Evaporation of the combined filtrates, and flash chromatography of the residue over silica gel (1 x 15 cm), using 1:20 EtOAc-hexane, gave **34** (65.3 mg, 92%) as a pure (<sup>1</sup>H NMR, 300 MHz), colorless oil: FTIR (CH<sub>2</sub>Cl<sub>2</sub> cast) 1717 cm<sup>-1</sup>; <sup>1</sup>H NMR (CDCl<sub>3</sub>, 300 MHz) δ 0.05 (s, 9 H), 1.42 (t, *J* = 2.5 Hz, 2 H), 2.02 (s, 3 H), 2.44 (ddt, *J* = 15.4, 7.0, 2.5 Hz, 1 H), 2.53 (ddt, *J* = 15.4, 6.0, 2.5 Hz, 1 H), 2.79 (dd, *J* = 16.6, 8.1 Hz, 1 H), 3.00 (dd, *J* = 16.6, 6.5 Hz, 1 H), 3.35 (dddd, *J* = 8.1, 7.0, 6.5, 6.0 Hz, 1 H), 7.16-7.36 (m, 5 H); <sup>13</sup>C NMR (CDCl<sub>3</sub>, 75.5 MHz) δ -2.0 (q'), 7.0 (t'), 26.3 (t'), 30.5 (q'), 40.3 (d'), 48.7 (t'), 76.2 (s'), 79.8 (s'), 126.6 (d'), 127.4 (d'), 128.4 (d'), 143.7 (s'), 207.4 (s'); exact mass *m/z* calcd for C<sub>17</sub>H<sub>24</sub>OSi 272.15964, found 272.15931.

## References

- (56) Timell, T. E. *Can. J. Chem.* **1964**, 42, 1456-1472.
- (57) Pornet, J.; Damour, D.; Miginiac, L. *Tetrahedron* **1986**, 42,

2017-2024.

- (58) (a) Cope, A. C.; Cotter, R. J. *J. Org. Chem.* **1964**, 29, 3467-3469. (b) Irwin, A. J.; Jones, J. B. *J. Am. Chem. Soc.* **1977**, 99, 556-561.
